# Supplementary material
Source: publisher figshare collection journal article supplement (https://gsajournals.figshare.com/ndownloader/files/14094047)
Supplement: Supplementary file 1 [file 14094047]

LI_25	LI_26	LI_27	LI_28	LI_29	LI_30	LI_31	LI_32	LI_33	LI_34	LI_35	LI_36	LI_37	LI_38	LI_39	LI_40	LI7_25	LI7_26	LI7_27	LI7_28	LI7_29	LI7_30	LI7_31	LI7_32	LI7_33	LI7_34	LI7_35	LI7_36	LI7_37	LI7_38	LI7_39	LI7_40	disp_25	disp_26	disp_27	disp_28	disp_29	disp_30	disp_31	disp_32	disp_33	disp_34	disp_35	disp_36	disp_37	disp_38	disp_39	disp_40	disp7_25	disp7_26
0.503634791	0.488656067	0.493238963	0.489780215	0.482734211	0.388492682	0.347261947	0.269457634	0.210472517	0.16068842	0.113992405	0.088636228	0.073856421	0.072577452	0.072925113	0.069064365	0.676356444	0.677261538	0.65067114	0.67940155	0.691018679	0.610904842	0.621317369	0.563314569	0.422815711	0.366809016	0.269038644	0.163392459	0.078338543	0.073790118	0.074123713	0.070472621	3.155194884	3.188075762	3.260257507	3.012341851	3.000268195	2.318799113	1.942710201	1.478868673	1.191903182	0.88999513	0.630227241	0.540586997	0.57569642	0.537964008	0.46949188	0.425121175	8.554440623	7.688224052
0.563164917	0.551838458	0.549904698	0.551497079	0.529274347	0.511705713	0.489337254	0.398757573	0.24529538	0.106398315	0.072082563	0.072047929	0.069558197	0.070506809	0.073309707	0.071288416	0.666881678	0.67434229	0.691571697	0.704590779	0.690752826	0.68254155	0.634381722	0.552643075	0.359163182	0.161068772	0.090327107	0.079293323	0.071860178	0.072515614	0.075188171	0.07348733	3.058834329	3.04772245	3.090864044	3.12463565	3.099290343	2.941240665	2.748424558	2.337242733	1.445725463	0.728768484	0.501092662	0.537992358	0.463168887	0.438103323	0.507660557	0.442231381	11.56435621	11.32247814
0.580643469	0.570918293	0.5821824	0.558017177	0.496707665	0.485551509	0.457965546	0.370060549	0.252062424	0.116887743	0.088532488	0.087940474	0.085643761	0.087695269	0.087049562	0.082234933	0.70825727	0.73230193	0.742505561	0.738982545	0.662010359	0.662769208	0.637201796	0.534564763	0.33852692	0.155578272	0.106072884	0.102812904	0.090291081	0.090527533	0.088368564	0.0834196	3.345389104	3.421867252	3.497143075	3.485783083	3.019488324	3.002501591	2.832469563	2.239144698	1.570499805	0.909089597	0.792616514	0.745354174	0.664079617	0.606542986	0.52320852	0.461450075	10.78892594	10.62377918
0.563898928	0.553668334	0.541557336	0.539569682	0.519796909	0.458249853	0.404445507	0.304216218	0.239348549	0.1775023	0.102103821	0.089326098	0.085644902	0.082779595	0.085217794	0.08388517	0.675259788	0.673751146	0.6994806	0.689060899	0.69802988	0.642522772	0.57790794	0.439449015	0.376574174	0.30907547	0.177029515	0.111439759	0.092469002	0.084296081	0.086154699	0.085557228	3.199039715	3.274616627	3.293612801	3.309413491	3.186397989	2.817719957	2.4585087	1.812409735	1.512874504	1.175926454	0.762756103	0.66078421	0.602926438	0.48468067	0.489318939	0.537765596	11.0368099	10.76758703
0.512923209	0.505617125	0.5099507	0.471974609	0.480473148	0.398765798	0.415710582	0.383896202	0.254151723	0.136939601	0.095669302	0.093422189	0.089508283	0.086928044	0.088832379	0.083046552	0.60199835	0.621474938	0.641248421	0.615211139	0.624526912	0.570227889	0.583640502	0.560334814	0.427658219	0.260673291	0.165029217	0.147504453	0.116598796	0.090422208	0.093383074	0.084519796	3.326358604	3.291168518	3.338932518	3.130106203	3.081681986	2.526338145	2.725345812	2.507887144	1.555714647	0.928336885	0.761456555	0.683353432	0.62998691	0.601819654	0.601803459	0.541656817	10.63470394	10.48005828
0.497717005	0.488956358	0.506763198	0.525493117	0.468929182	0.461003216	0.413044553	0.355581237	0.172832621	0.084298668	0.076569144	0.076658318	0.073756679	0.071496682	0.073330979	0.072884693	0.589598586	0.606102024	0.657154404	0.681284629	0.665080129	0.65328899	0.60038446	0.558724899	0.281660812	0.153792145	0.12435398	0.107612387	0.085955399	0.072728158	0.074920515	0.0742662	2.652529986	2.839161597	2.887799666	3.002239079	2.623979386	2.614404546	2.408725704	2.155362539	1.161841636	0.65316853	0.585391205	0.531535308	0.509564566	0.412748288	0.429209213	0.412056214	8.998351483	8.876021926
0.540065679	0.557099579	0.538850502	0.53474636	0.51862043	0.507922149	0.496510022	0.44653165	0.209214519	0.13438737	0.105403206	0.093954014	0.09239107	0.096663974	0.097196787	0.095079226	0.662156785	0.694776862	0.681487303	0.680135649	0.652206206	0.631680214	0.638706627	0.577521069	0.358352595	0.212516485	0.139478396	0.103859272	0.095410624	0.098018803	0.09930152	0.098242399	3.169985961	3.253050986	3.319505071	3.303159369	3.303484029	3.263367864	3.126557469	2.973347773	1.40106446	0.995477072	0.905194734	0.824624312	0.758460088	0.673525137	0.659078765	0.648656749	11.03907378	11.19476782
0.524584492	0.524656042	0.521568615	0.50608733	0.505914595	0.492177505	0.45087528	0.369680808	0.24294303	0.156085625	0.102209756	0.091681926	0.091145461	0.089961729	0.090587016	0.087555247	0.62077531	0.634063497	0.644777243	0.642039038	0.643735562	0.636609752	0.621117178	0.528788911	0.411746517	0.254744761	0.138697695	0.100318061	0.095526896	0.090673771	0.091731618	0.088758095	2.901557763	3.053029584	3.111034704	3.153063523	3.136127802	3.060818483	2.728318954	2.383907658	1.639269982	1.065282201	0.777043894	0.652265765	0.739030034	0.614905123	0.658838908	0.598663484	9.154688854	9.531440676
0.55076189	0.533920569	0.520115397	0.50901323	0.522832819	0.468237319	0.431545427	0.310778279	0.166947754	0.08667129	0.080614289	0.081326312	0.08354414	0.08380828	0.082388099	0.080744635	0.633445398	0.63838474	0.637243176	0.638894392	0.653658922	0.616594316	0.589254241	0.38961568	0.208588406	0.101430158	0.087412298	0.090258175	0.0885868	0.091962457	0.083900608	0.082676379	3.097327607	3.045198896	3.133396403	3.18421882	3.252437011	2.70122306	2.518797654	1.952069588	1.107824925	0.72070899	0.679043839	0.58899813	0.527336486	0.547448844	0.53254431	0.489791561	10.73721734	10.80941644
0.559234713	0.578186521	0.600170775	0.579645045	0.567786515	0.541189138	0.531768191	0.490641299	0.365984167	0.138614206	0.095944891	0.088015602	0.089024242	0.08658417	0.086049065	0.083119547	0.622865416	0.669419679	0.714107297	0.702013744	0.688255669	0.666238683	0.65682497	0.632620266	0.520527561	0.236856352	0.151362906	0.115581255	0.095354077	0.088477494	0.087695272	0.084541962	3.651241862	3.6656385	3.732190317	3.594470094	3.454039974	3.236714574	3.043428641	2.831418589	2.097715814	0.972101797	0.770919016	0.625824344	0.648984505	0.58544977	0.567845911	0.496316342	10.13134058	10.95435055
0.503984491	0.484806976	0.487716664	0.49457599	0.491452091	0.430787394	0.434900133	0.361014572	0.294995949	0.159731294	0.082187723	0.075298065	0.077531662	0.077046809	0.078056488	0.077866293	0.629610126	0.60460906	0.617252165	0.646791894	0.626525237	0.592155325	0.607051617	0.567861841	0.523232434	0.301715215	0.130322232	0.091967486	0.083258709	0.078779309	0.0796273	0.08014227	2.909881601	2.942185747	3.084785681	3.114875967	3.156615019	2.756759891	2.714735012	2.143285469	1.846286692	1.012218004	0.570096435	0.546764077	0.547174509	0.529575705	0.504380846	0.522844942	9.006836356	8.858219358
0.591392845	0.570071538	0.552294698	0.564499515	0.543893622	0.53523301	0.504531622	0.442747304	0.370659601	0.20153718	0.092283317	0.076195735	0.074493898	0.074326384	0.072498262	0.071696944	0.631378824	0.633507191	0.639375939	0.668564662	0.673472107	0.68341257	0.633964246	0.601263287	0.547163371	0.37265913	0.144210395	0.079044107	0.076547938	0.076072277	0.073917667	0.073731815	3.66769415	3.608286851	3.52766704	3.47562168	3.45669202	3.308440437	3.169114809	2.787550377	2.137417439	1.100430876	0.692676692	0.603507311	0.55118194	0.493966162	0.462641912	0.419217364	11.30257493	11.65370014
0.614353599	0.607489725	0.579188913	0.580692057	0.577396072	0.560172507	0.514029976	0.443015741	0.313280437	0.146922941	0.083080475	0.077621094	0.077157319	0.078399353	0.076098749	0.070986855	0.693284795	0.699330088	0.703440728	0.703488053	0.697482859	0.697658415	0.666714039	0.59032721	0.425191782	0.218156443	0.112221424	0.093824333	0.082219652	0.082385687	0.07681598	0.073408056	3.792372668	3.626768578	3.382540986	3.467083229	3.518855571	3.270698005	2.912348628	2.562283711	1.797001613	0.821356838	0.530243627	0.480676676	0.462401553	0.493707227	0.414556328	0.400346481	12.35973734	12.87637812
0.443010356	0.457244251	0.469615373	0.458053231	0.40597087	0.351640495	0.336140432	0.263805176	0.146971211	0.085152704	0.076941882	0.076416842	0.073495072	0.078968858	0.077937906	0.072948876	0.539848495	0.581121436	0.622916862	0.628761495	0.593385094	0.550016147	0.543489229	0.40465859	0.240722782	0.099820418	0.092401908	0.088180202	0.077427755	0.080737502	0.079308364	0.07423212	2.575976629	2.8380154	2.916475763	2.658208315	2.326526089	2.071033793	1.964640158	1.729106917	0.939980581	0.611645779	0.577655125	0.545549245	0.510547745	0.568961536	0.500977357	0.427317778	8.063124535	8.642700255
0.569251846	0.551462113	0.539271482	0.536239247	0.495904536	0.449490436	0.426373159	0.338205602	0.132256537	0.101810304	0.080825213	0.078228265	0.077537943	0.073949558	0.071421648	0.072361169	0.631367387	0.648614487	0.653258426	0.657314905	0.636808137	0.616693745	0.596049142	0.4933315	0.200100054	0.132881685	0.124929588	0.102317044	0.087226208	0.075583173	0.072558907	0.073453618	3.423608651	3.479964588	3.337630609	3.377220007	3.127479466	2.656540147	2.598464017	2.151876184	0.975609131	0.836955077	0.795008334	0.609606731	0.618594467	0.545676158	0.420250425	0.399115642	10.28052428	9.609762855
0.522736741	0.527962449	0.531872407	0.492519665	0.475885973	0.469623373	0.426271124	0.354880227	0.21166394	0.087905979	0.087900845	0.082914498	0.079252469	0.080820565	0.080533155	0.077121306	0.644576663	0.654721617	0.693579513	0.65823489	0.666706741	0.662394907	0.611126501	0.560094792	0.33474612	0.126390959	0.120787218	0.099501773	0.084448037	0.081784903	0.081360758	0.080211525	2.821684414	2.919497551	2.93640797	2.712848269	2.630067945	2.770239771	2.38263643	1.880629192	1.217240807	0.687149851	0.71334008	0.585963425	0.505960531	0.486453911	0.459371436	0.437600309	9.004229481	9.08920532
0.48061765	0.44797247	0.448859815	0.388862832	0.323062101	0.300136583	0.20086205	0.127869109	0.078887054	0.074716632	0.07702009	0.079282142	0.078090728	0.076927457	0.078247965	0.077222662	0.603550499	0.588789178	0.599438457	0.574914567	0.551115265	0.582510268	0.448008836	0.243299481	0.106985627	0.08734098	0.082914986	0.082848004	0.081513195	0.079326995	0.081055475	0.081103201	2.643207457	2.499375755	2.598939202	2.083081651	1.782008259	1.656399672	1.214507072	0.719349063	0.491017104	0.459963585	0.521055312	0.490397548	0.501953139	0.448354341	0.514140875	0.518782259	9.259559143	8.284274185
0.62028758	0.627572074	0.577781536	0.610709668	0.61082775	0.60548944	0.599666387	0.546059525	0.408759677	0.202514879	0.114806433	0.093620722	0.08874965	0.085385068	0.082555329	0.079630893	0.738221435	0.758234821	0.703284297	0.74534638	0.755395683	0.740269705	0.741211438	0.684745543	0.560267234	0.342525905	0.216288927	0.137668874	0.0934926	0.086846744	0.084029805	0.081826278	3.494493687	3.807071478	3.642963976	3.876930417	3.775310621	3.900020096	3.831996964	3.548385968	2.345195091	1.228707739	0.773191663	0.822127323	0.869750825	0.5789492	0.544434414	0.520527375	11.89721094	11.74212543
0.576132574	0.558819604	0.587201753	0.564670756	0.55461117	0.544965941	0.535696263	0.472581357	0.286146567	0.107228921	0.089672375	0.080747288	0.078344235	0.080992679	0.079301965	0.079832185	0.675489199	0.693304659	0.735293275	0.715882041	0.697330765	0.694655598	0.68078255	0.634185387	0.407033899	0.141315704	0.136561534	0.091311767	0.084811393	0.082206978	0.080133122	0.081107188	3.60120387	3.563689259	3.666532958	3.60583153	3.572212082	3.643711596	3.487040173	3.026025017	1.761976996	0.740224197	0.610743509	0.580444647	0.560005686	0.449963108	0.441986947	0.395655547	12.38317251	11.67915469
0.501291915	0.507606581	0.493303336	0.521501039	0.488664101	0.450225991	0.407280363	0.337933786	0.230524782	0.094862607	0.084164593	0.08097503	0.079836792	0.076374563	0.075338303	0.071516087	0.641269794	0.652315206	0.642279326	0.685882422	0.667389737	0.616143474	0.593846349	0.494406753	0.359332545	0.133806375	0.103311136	0.089407552	0.084511771	0.080071413	0.078928173	0.075702184	3.0171288	3.064691887	2.917206143	3.083180346	2.991217869	2.831595716	2.690313971	2.149203363	1.412704631	0.734403038	0.674731646	0.616327691	0.618030088	0.533211603	0.513513773	0.476830542	10.41766628	10.93867937
0.553790061	0.528137592	0.555748488	0.519718701	0.502115959	0.480333491	0.44322884	0.367647508	0.207024168	0.086829695	0.079830313	0.077163572	0.074927803	0.069336993	0.07041204	0.070452535	0.641022018	0.641225572	0.665159545	0.655498258	0.639273443	0.629164493	0.63291811	0.572965074	0.385162159	0.153733107	0.108465944	0.087555564	0.079261338	0.070793882	0.07229711	0.072301629	3.175679677	3.148868306	3.369376013	3.144793082	3.104291891	2.93609981	2.728274314	2.23193704	1.311908938	0.696621642	0.799063274	0.686739466	0.641638745	0.519377487	0.436465187	0.422121486	9.320450658	8.78773507
0.533121187	0.540854537	0.538374902	0.527477778	0.52690673	0.514415159	0.461442725	0.408071855	0.273876846	0.129386252	0.084113839	0.071966134	0.071039231	0.070473816	0.069887232	0.069502208	0.639612839	0.650531128	0.651558087	0.646257815	0.669919514	0.656631352	0.617511801	0.596295241	0.456839817	0.240353351	0.118702757	0.083744125	0.073032031	0.071679426	0.07084922	0.0707881	3.016216419	3.132443797	3.143319462	3.171092406	3.296861947	3.112774516	2.778855632	2.493055237	1.591995257	0.853816093	0.659418414	0.536383592	0.474373501	0.48684312	0.44272597	0.431319904	9.368709311	9.491192961
0.487785072	0.448373512	0.470914584	0.440505742	0.420495745	0.38053269	0.354835598	0.30164677	0.194652905	0.102065271	0.082835769	0.07949165	0.078783482	0.081263793	0.07897729	0.075668924	0.657212239	0.67046296	0.680352505	0.642881394	0.632559229	0.579996567	0.529001244	0.504398806	0.399559957	0.210499143	0.117309291	0.106481675	0.083575762	0.083094542	0.081590699	0.080784262	2.76281273	2.432503096	2.67793235	2.42107375	2.318349966	2.068746758	2.004180816	1.735637278	1.067790036	0.613290324	0.538085053	0.537227613	0.572535197	0.586474782	0.554930692	0.521645156	9.30104305	8.823713465
0.414247417	0.443642744	0.43149779	0.448978238	0.426434592	0.412284127	0.40896821	0.319349191	0.200252263	0.094643394	0.072229587	0.063148411	0.065313373	0.064801409	0.065365973	0.061509115	0.537827143	0.601520168	0.622425807	0.653657156	0.632213219	0.59858327	0.590088839	0.527767437	0.374658725	0.165324658	0.118645042	0.07345009	0.075038706	0.068407254	0.068830076	0.065095227	2.18262579	2.34304286	2.290827232	2.337912502	2.305392955	2.39532143	2.270933804	1.704420069	1.026428612	0.550003814	0.504497828	0.486828075	0.522755013	0.57298482	0.489747306	0.394948087	6.875269366	7.293553515
0.555920002	0.547571438	0.549214477	0.521268745	0.537757946	0.481001105	0.392360904	0.229353488	0.141880282	0.091897909	0.084126791	0.083041071	0.081733134	0.074714839	0.076893871	0.07703681	0.644009149	0.655350519	0.656902484	0.646570409	0.671771143	0.632562276	0.531244863	0.369560489	0.20570301	0.120801133	0.110542648	0.103051414	0.095982295	0.076524399	0.077439414	0.078079538	3.29380352	3.304490674	3.077295768	2.966289531	3.001759102	2.646526272	2.260231488	1.323862209	0.787854741	0.688651211	0.636805716	0.591874673	0.589753758	0.47124584	0.47076439	0.511290854	11.22217838	11.01245423
0.557336918	0.558150295	0.582050384	0.581239573	0.55517749	0.565815106	0.513286787	0.497353474	0.351640872	0.189025061	0.072401034	0.071803345	0.068730778	0.069820318	0.069933626	0.07007285	0.637459028	0.65961122	0.682045018	0.701509155	0.696203632	0.712476833	0.655213478	0.614981007	0.452118184	0.245132916	0.084813221	0.082948379	0.071175509	0.07154189	0.071423045	0.072832188	3.300678343	3.415958571	3.577069703	3.566291096	3.382394172	3.417226033	3.14893235	3.00582414	2.027696053	1.066538381	0.527656792	0.469047132	0.45061824	0.414258389	0.371242506	0.39778368	9.500409986	9.771612948
0.576734025	0.584863818	0.569574373	0.558201314	0.573536153	0.564989208	0.503330051	0.413327432	0.311204974	0.080619506	0.076921723	0.076250913	0.073950372	0.073771202	0.074539827	0.072468736	0.655853797	0.691245065	0.696446867	0.708362198	0.721041835	0.723592418	0.678828928	0.587526045	0.426731848	0.110203705	0.098110772	0.082694627	0.079676832	0.075265041	0.076050719	0.074222931	3.650544511	3.686435322	3.690902505	3.64366559	3.860832903	3.892045107	3.273958115	2.802090567	2.042963937	0.737291216	0.554284524	0.568122077	0.573552975	0.536165252	0.481563878	0.437044192	11.99232969	11.80479609
0.533273748	0.531676084	0.53188462	0.555260089	0.546393361	0.529592479	0.50290261	0.397440787	0.404517678	0.356845017	0.26543303	0.148060801	0.090306337	0.071674966	0.069606514	0.068398641	0.641995302	0.669539058	0.684672127	0.713022228	0.693827011	0.67465581	0.637220049	0.547726657	0.537695992	0.495874717	0.454217278	0.346008904	0.187995119	0.073791807	0.070478	0.069108736	3.084220428	3.196012652	3.330078734	3.696238849	3.685609617	3.546628549	3.32292818	2.66022304	2.651524977	2.2594115	1.585642457	0.859813746	0.605940385	0.464405303	0.438804871	0.351286035	12.32378226	11.7328363
0.549481039	0.565079264	0.549008348	0.54827553	0.489557883	0.468295489	0.400030385	0.397704832	0.306100417	0.207777695	0.137986519	0.099599892	0.090346491	0.086153362	0.08383012	0.082673186	0.654615917	0.681528498	0.677279454	0.689210516	0.623731542	0.6280343	0.570208933	0.581494746	0.526038903	0.368994932	0.29353474	0.205794181	0.119235114	0.08968081	0.08525225	0.085261543	3.019544092	3.165113751	3.281324594	3.227380364	3.030870716	2.829495678	2.444904716	2.444610603	2.024096016	1.424640429	1.00028106	0.790597759	0.654538399	0.58564544	0.465867309	0.445594289	9.985705237	10.33578597
0.606813341	0.594969555	0.58434283	0.596687044	0.582114617	0.55565588	0.533825582	0.41146008	0.243457862	0.116696649	0.082195703	0.080527599	0.079665766	0.077289872	0.075941497	0.072953668	0.701006553	0.718381153	0.724748946	0.741873413	0.742801179	0.712604518	0.686699104	0.559201158	0.381958222	0.15605498	0.09133571	0.084135638	0.083643624	0.07855102	0.076526161	0.073676722	3.818346268	3.732257287	3.666163232	3.76689749	3.622433854	3.56185439	3.39009273	2.512300519	1.37968869	0.74355996	0.584362068	0.540603933	0.501842494	0.475128515	0.415615659	0.366820674	12.52708256	12.30214253
0.529810781	0.566526211	0.563028922	0.541027381	0.540799633	0.52123557	0.520895978	0.496466468	0.376562978	0.248821944	0.084917004	0.077225936	0.076342617	0.078746376	0.078807152	0.075330691	0.614115411	0.667874452	0.685233092	0.672639856	0.693451617	0.6658273	0.691167332	0.643251804	0.498449532	0.362253111	0.098208869	0.094920648	0.080323437	0.082326802	0.082809296	0.078718802	3.107832246	3.501512376	3.312740751	3.211059968	3.171897272	3.205474418	3.170734707	3.083853909	2.245852589	1.449950099	0.692780482	0.620651822	0.641244166	0.614836669	0.535603698	0.458598503	10.5559429	11.31836289
0.580946262	0.555481575	0.576992551	0.551183558	0.556598631	0.518310073	0.483622702	0.48261749	0.234605166	0.136935218	0.076969995	0.07093035	0.07157869	0.071893205	0.071898843	0.069699552	0.664769374	0.667323741	0.710322067	0.701662183	0.702304438	0.66586133	0.61994087	0.617913365	0.34099992	0.173734712	0.086634418	0.082463398	0.076583147	0.076641182	0.074543194	0.074818296	3.275154788	3.300618082	3.5449135	3.359746313	3.43647012	3.081063492	2.970711534	2.770083759	1.420957708	0.843256651	0.625652832	0.488583279	0.482562444	0.479208531	0.458593696	0.400140956	12.40290855	11.76432739
0.476017272	0.463481509	0.48919918	0.456599269	0.473990573	0.443320675	0.387335832	0.282377008	0.177949118	0.087386046	0.082435901	0.078333844	0.075753431	0.077217416	0.075619311	0.071343952	0.568806054	0.575539094	0.609793452	0.583175458	0.60753116	0.600895558	0.531511608	0.436063946	0.275501737	0.124695415	0.121138144	0.095762483	0.084857911	0.079818985	0.07660558	0.072502655	2.346572486	2.485160914	2.540318119	2.315958916	2.506819542	2.443211112	2.061618901	1.665496068	1.046901046	0.651231798	0.630269303	0.590899664	0.508403859	0.473352295	0.438062622	0.42076152	8.545768619	8.226770103
0.590979109	0.607662956	0.608464829	0.60834675	0.570804425	0.534976015	0.51454838	0.438297764	0.402379784	0.204493295	0.088144212	0.071214353	0.070687449	0.071287539	0.070684945	0.069610503	0.669393211	0.704130544	0.726079576	0.732584266	0.710555772	0.676692258	0.654007849	0.563492599	0.552724971	0.318047135	0.107121184	0.082798522	0.078467406	0.077190481	0.077320404	0.077157323	3.431247368	3.656417511	3.728564576	3.775147425	3.649041861	3.442651651	3.124789812	2.671479788	2.206215487	1.246420756	0.806393149	0.627879574	0.550944512	0.465092276	0.43174762	0.40171193	11.97889057	11.98340699
0.551132567	0.543839458	0.542257176	0.521271074	0.501817566	0.490253801	0.469120524	0.421956299	0.398096486	0.195858635	0.137544755	0.077965391	0.078290665	0.074551878	0.074732671	0.072668812	0.621077226	0.63081507	0.643984393	0.649107825	0.640634521	0.629579876	0.610296547	0.590918633	0.533283613	0.266563747	0.208904241	0.107787991	0.085442167	0.07654646	0.075462027	0.073785828	3.132043275	3.224348413	3.258608691	3.293399606	3.038538629	3.021010074	2.816202263	2.454653781	2.326922073	1.236495779	0.988227836	0.547249673	0.598874684	0.497657061	0.446622553	0.380856178	10.54949705	10.23341509
0.556397758	0.570967142	0.539402078	0.536283078	0.526743055	0.519626004	0.497490188	0.438408168	0.374878273	0.231518705	0.093995239	0.084092874	0.087276549	0.086159658	0.085120714	0.080987955	0.640891152	0.680401711	0.651823774	0.662996649	0.650921741	0.647759768	0.631893447	0.552581244	0.476996664	0.311865753	0.114596166	0.096016447	0.092451772	0.087672037	0.085947345	0.082323855	3.721086584	3.787641209	3.598135718	3.512591975	3.555418936	3.535642503	3.508157324	3.141581011	2.549389917	1.483788553	0.649485457	0.521233821	0.508816035	0.494556193	0.442614334	0.386951613	12.64353733	12.66120684
0.61489553	0.636686679	0.620549663	0.616600782	0.560609454	0.564151244	0.528502049	0.381617703	0.186897764	0.114524445	0.094951325	0.092029937	0.096281824	0.094921795	0.09274982	0.090970213	0.702157163	0.72674025	0.731034304	0.723733449	0.676915141	0.692244676	0.653345718	0.504974568	0.240001052	0.157058513	0.121389105	0.114724163	0.103479015	0.098465804	0.094091481	0.092636815	3.705364959	4.00648124	3.983945571	3.93147856	3.565587884	3.609489267	3.40301132	2.340089421	1.38954222	0.912908626	0.7085774	0.6962636	0.700149198	0.640367832	0.606902974	0.590906811	12.70469524	12.96895161
0.52635123	0.524560149	0.523985307	0.520275514	0.509347763	0.483004105	0.464629787	0.394357546	0.234755631	0.112243381	0.096719694	0.083813444	0.081777471	0.081548763	0.081273703	0.077448439	0.65884404	0.697402729	0.720370843	0.710144806	0.723399745	0.671891679	0.652122524	0.561643998	0.357711804	0.20193918	0.171629417	0.099199569	0.085504862	0.084488568	0.08349847	0.079275958	2.939386038	3.070993205	3.030378225	3.200174705	3.097054041	2.984562989	3.056482356	2.429699366	1.65653417	0.871967506	0.699136684	0.665613421	0.578294344	0.650130194	0.615344978	0.548516714	10.3501162	10.28853796
0.539996997	0.539708201	0.497556213	0.495449167	0.488403237	0.468271785	0.430948979	0.385070688	0.282284618	0.165249023	0.119647887	0.086197112	0.080422385	0.081093817	0.082730162	0.081330372	0.639822133	0.663852802	0.649082416	0.655975162	0.65597238	0.629528309	0.595650369	0.541766501	0.430396419	0.266155978	0.187146889	0.123166247	0.086820152	0.082434208	0.084157857	0.082520788	2.881421982	2.941184495	2.698536738	2.661779697	2.740424912	2.59584066	2.251999862	2.076621074	1.481417146	0.883643079	0.814020971	0.5954806	0.520495211	0.485282364	0.569036353	0.518760794	9.453351056	9.565984108
0.526094062	0.513489287	0.501609489	0.497990801	0.495092945	0.468089904	0.403967348	0.34370958	0.191527173	0.101774247	0.06827524	0.067730945	0.06647358	0.067607106	0.067396938	0.063524354	0.642106282	0.652790432	0.655733923	0.661685686	0.675032567	0.658907691	0.59258768	0.549692108	0.333258462	0.169491485	0.078340233	0.071384799	0.067561619	0.068407123	0.068492911	0.064668148	2.854959044	2.933176418	2.831719195	2.754158461	2.755763967	2.649704165	2.114662213	1.827724419	1.000850493	0.593009957	0.438408305	0.435639148	0.388793689	0.386034212	0.384279118	0.312315991	10.39915966	9.731360021
0.575550622	0.567736307	0.513477789	0.497345626	0.48678339	0.412214202	0.363557436	0.225354574	0.130251006	0.08395588	0.083520496	0.077348994	0.078210608	0.076076102	0.074735682	0.072455612	0.678962357	0.69686188	0.676312573	0.654739414	0.630649303	0.58430442	0.594080284	0.447537355	0.271361511	0.146826355	0.144059597	0.095241728	0.087495097	0.078106375	0.077490362	0.075024577	3.483606213	3.470409727	3.112703327	3.130858433	3.121387664	2.497504115	2.201221709	1.435427939	0.841158489	0.610149097	0.623893556	0.638532292	0.583416379	0.55740253	0.562567633	0.489546963	11.04247369	10.57180819
0.572475279	0.599936875	0.578025194	0.55377594	0.562376435	0.540897117	0.524114184	0.502423594	0.366763784	0.205126609	0.094201087	0.08740488	0.081875914	0.081524384	0.081400425	0.078931887	0.622312225	0.656120052	0.650742575	0.630740459	0.646666191	0.642041494	0.625548603	0.629956829	0.513387721	0.321345302	0.144600268	0.123638555	0.091436273	0.084273515	0.082488376	0.080528481	3.599169159	3.82475546	3.712773817	3.469782574	3.532389467	3.683516598	3.425820719	3.191513018	2.234044168	1.360408816	0.725921594	0.751374307	0.674849862	0.61616113	0.568651263	0.514645936	11.40944317	12.5126418
0.515425965	0.521811698	0.533230603	0.518247204	0.531902607	0.518592005	0.476268807	0.4279678	0.358344745	0.248404755	0.136875598	0.086521406	0.078154792	0.079798249	0.082107694	0.079823609	0.637115125	0.655611502	0.677908008	0.669485719	0.691732196	0.669650367	0.651461042	0.607282278	0.540162383	0.388473407	0.234756009	0.127409993	0.083547339	0.080605822	0.083451863	0.081159922	2.904442974	2.917027706	3.080950005	2.999174218	3.210823496	3.053700725	2.826058884	2.585947571	2.154845103	1.542853211	0.866626011	0.529268236	0.46608685	0.498679934	0.486885526	0.433639374	9.437371922	9.069787126
0.569201516	0.560387073	0.591621293	0.576146792	0.57672666	0.543679848	0.482185308	0.481240396	0.299054963	0.117788565	0.080642029	0.078005495	0.076273269	0.074766815	0.074081893	0.070305653	0.655912336	0.666607756	0.724979828	0.718243312	0.724018519	0.682779456	0.630248133	0.599653386	0.424403212	0.151245476	0.097346211	0.084364497	0.080091662	0.076366124	0.075521264	0.071280336	3.468810122	3.52244125	3.661625517	3.657433837	3.590165517	3.411275275	2.870082033	2.864279612	1.650195789	0.770924468	0.525345137	0.539416916	0.447790861	0.443813399	0.426065407	0.34529628	12.51781061	12.18969
0.54987189	0.565563726	0.56660848	0.572573521	0.545487037	0.509684714	0.491686921	0.448658303	0.316988004	0.149235125	0.092520307	0.090642484	0.090620639	0.089271544	0.08518883	0.090057471	0.6407155	0.680888784	0.695611541	0.713986041	0.702548074	0.639503029	0.625630564	0.561220233	0.418231733	0.187204809	0.119631334	0.105637005	0.094795475	0.091126065	0.086928085	0.091689489	3.285371987	3.519332195	3.471588744	3.692920705	3.415979828	3.208140373	3.104513181	2.709097513	2.01998922	1.153228232	0.754986424	0.698980807	0.668039974	0.614603955	0.548788343	0.514340958	11.69415884	12.12987272
0.571792973	0.558545526	0.56960369	0.557691997	0.515287704	0.510271664	0.473977622	0.451029127	0.364904174	0.200777281	0.108841437	0.089323951	0.084743922	0.08441324	0.085811951	0.085740918	0.642726692	0.646502856	0.681722305	0.669513702	0.630602449	0.63399998	0.611673608	0.557141801	0.521908363	0.293906766	0.154590335	0.105191902	0.095648044	0.093067509	0.091840116	0.09057677	3.269258621	3.195460994	3.132488839	3.160024138	2.847180883	2.83808998	2.581987824	2.439997144	1.874248552	1.250952742	0.736843563	0.640560762	0.537634157	0.53927076	0.544809052	0.511134242	12.12042809	11.58425421
0.558065203	0.5625397	0.534520205	0.542856641	0.516779663	0.468989102	0.450840564	0.382571557	0.338882536	0.195926047	0.092905686	0.083885124	0.081454567	0.081701339	0.083396177	0.080985257	0.655511573	0.654125605	0.641470521	0.651812494	0.635517514	0.603583384	0.55803322	0.522905468	0.437769683	0.284109942	0.124042905	0.092953196	0.086384762	0.08312465	0.085374978	0.083022603	3.340392118	3.499149383	3.423294621	3.483321435	3.327162443	3.079417135	3.054941095	2.606449329	2.181205317	1.16227045	0.665950252	0.630061513	0.573012001	0.564785189	0.581868058	0.468029944	11.66321184	11.54150113
0.515497018	0.540057301	0.523248983	0.502395227	0.502784786	0.476811243	0.418976983	0.368594861	0.227029081	0.095153501	0.075905799	0.073580152	0.071174572	0.071607263	0.072260339	0.071207052	0.61889773	0.65735709	0.653320941	0.655026107	0.648191741	0.649622546	0.58059045	0.57955712	0.416048645	0.14937646	0.089446369	0.077797492	0.073422003	0.073078066	0.073517043	0.072149392	2.843543591	3.051466542	2.968775591	2.874839329	2.864753669	2.714920781	2.364108722	2.048555686	1.294696474	0.654549638	0.627927859	0.594704027	0.501091071	0.445436435	0.463021576	0.413692724	9.252438902	9.666433339
0.552824269	0.530924252	0.531642933	0.526576354	0.527566398	0.487559363	0.474284103	0.375371122	0.243959232	0.110248138	0.086493978	0.084390585	0.085768976	0.083459229	0.083439417	0.078201706	0.680626483	0.651245727	0.682112812	0.655409707	0.664912877	0.620490075	0.60555346	0.513244373	0.359886937	0.174249759	0.135057695	0.101181133	0.090268474	0.086101283	0.084787986	0.079415919	3.122028433	3.111589171	3.108299926	3.187590269	3.194264763	3.030052005	2.879058894	2.164804098	1.464052166	0.790697771	0.650375953	0.616993487	0.572838709	0.541279069	0.482429994	0.464033872	11.48875179	10.75765637
0.517581269	0.504859987	0.521094397	0.524944938	0.472630217	0.506567933	0.505187266	0.404105559	0.274758703	0.105157306	0.082092182	0.081418427	0.084189989	0.081264045	0.079526845	0.073862606	0.584920163	0.604406619	0.613973395	0.626220208	0.588640698	0.625784585	0.630341763	0.553440867	0.398909182	0.164415216	0.091544363	0.091909852	0.092940444	0.08351708	0.080865487	0.075199116	3.078996354	3.145523499	3.205149233	3.233187089	2.999828524	3.190523131	3.163573693	2.500745238	1.708204113	0.845048576	0.598709164	0.655096279	0.62105934	0.541427571	0.443076931	0.378516326	10.19466645	9.846203902
0.493017645	0.486135615	0.461134407	0.453467253	0.419912575	0.441280915	0.406152254	0.361485046	0.261065845	0.144741485	0.104558817	0.099805403	0.092521233	0.090077433	0.085401252	0.082970218	0.594407896	0.591823677	0.580739703	0.59162796	0.556785316	0.588140402	0.55525064	0.528412964	0.437120383	0.238492921	0.145713922	0.12684458	0.094735262	0.090764459	0.086076422	0.083724943	3.001855606	3.012149066	3.0298575	2.935339622	2.890128637	2.967999855	2.774018008	2.53857083	1.804731213	1.137823454	0.887151565	0.845811481	0.692737954	0.619046694	0.534680403	0.526823306	8.872478972	8.980683584
0.48991424	0.480072	0.486336072	0.487998019	0.468917003	0.463958921	0.42870615	0.368711472	0.323766161	0.163134109	0.086993597	0.085494869	0.079513077	0.079616986	0.08224511	0.079297138	0.579724377	0.577536192	0.583624276	0.592627677	0.598061688	0.591420896	0.555121665	0.532278842	0.494241257	0.256262399	0.140435557	0.108659746	0.090822865	0.084566527	0.084995305	0.083889473	2.856877854	2.747614465	2.798935338	2.723201009	2.579656272	2.514027119	2.436701043	2.108828637	1.779085214	0.89982996	0.598151032	0.647147869	0.611393579	0.559605678	0.567448745	0.468888301	8.568446758	8.885909776
0.50854297	0.522793431	0.532824119	0.519681146	0.505827276	0.481700377	0.445165102	0.370580259	0.25607439	0.098137513	0.076432856	0.076681143	0.075473982	0.074214883	0.072777713	0.071053853	0.621209036	0.650637291	0.683476059	0.681846511	0.668318738	0.663842857	0.644664869	0.585228071	0.446086748	0.164282976	0.100977146	0.09061151	0.080305238	0.075078358	0.073638832	0.072089504	2.633397129	2.883436672	3.048588939	2.985620924	3.049036718	2.784558093	2.524603941	1.992867594	1.461200639	0.604205712	0.505199221	0.499307195	0.496404366	0.476474237	0.431426452	0.383682845	10.15284411	9.498390631
0.506348972	0.515248112	0.5066018	0.50570923	0.484098163	0.464878709	0.44231174	0.371717721	0.243874086	0.129990595	0.083475302	0.081541818	0.079564919	0.076669005	0.074459715	0.072785402	0.586671757	0.615821435	0.622830808	0.66014378	0.636096191	0.635102026	0.612264914	0.585514306	0.457624775	0.253345405	0.110264823	0.091621108	0.083942596	0.078147546	0.075585675	0.074539157	2.716366503	2.850610078	2.854041289	2.811621337	2.690289966	2.652974854	2.489911454	2.091344474	1.367093582	0.784501268	0.639815949	0.581261123	0.602476256	0.49317824	0.456067827	0.402687496	9.321198407	9.128325914
0.567511143	0.58741718	0.555361811	0.567473446	0.548212017	0.530264633	0.494522222	0.446562153	0.371099165	0.171069956	0.088981686	0.076107028	0.07182231	0.070749855	0.070655379	0.068794285	0.679306591	0.711160274	0.702294902	0.724889982	0.718726557	0.68805781	0.678636663	0.618199368	0.533463723	0.259665044	0.136367435	0.101994964	0.073113722	0.071513227	0.071583183	0.069394884	3.354402801	3.480983597	3.310083696	3.273073285	3.000597016	2.985794656	2.754982399	2.47715534	1.911797022	0.924314261	0.55633123	0.514159552	0.487470217	0.477983618	0.450833554	0.386183634	11.19951378	11.84892213
0.560552224	0.583853749	0.587616808	0.541470428	0.554395177	0.545343792	0.490333627	0.451155566	0.276373753	0.132121851	0.083903585	0.08056312	0.075806362	0.075861843	0.075333134	0.072527676	0.635231604	0.686473067	0.724259587	0.688713917	0.72432586	0.712235452	0.661715622	0.631039815	0.458469431	0.252762493	0.138729349	0.112030719	0.077737733	0.07821195	0.077312818	0.073679571	2.931466752	3.097816909	3.114966191	2.962296923	2.927806549	2.937596136	2.7035124	2.394620239	1.463677247	0.873100768	0.683966508	0.569129589	0.509371449	0.478078743	0.476770254	0.380429258	11.15954307	11.81992305
0.517088425	0.524474722	0.532361594	0.529261493	0.497925124	0.48763164	0.467058495	0.432073738	0.292252152	0.181659197	0.10852622	0.074768632	0.067974217	0.06879198	0.06942435	0.068755724	0.571073951	0.614418297	0.659642524	0.673409299	0.653561759	0.648289891	0.639430741	0.597251805	0.504359959	0.359206263	0.219210619	0.119904465	0.07269752	0.070141079	0.070496513	0.070255649	2.871456555	2.891694191	2.98237069	2.978778061	2.711748294	2.649992561	2.536345174	2.265861163	1.50672295	0.98242921	0.673151915	0.50389279	0.411882642	0.446392363	0.436811911	0.392450454	10.71705889	11.02983109
0.548797857	0.559486014	0.549124988	0.496383731	0.518700566	0.491644549	0.444490002	0.366534111	0.304085662	0.15641297	0.080134571	0.083173535	0.078218692	0.077138947	0.076457036	0.075415106	0.622360676	0.66157549	0.659729547	0.618283828	0.666751692	0.667678337	0.621237414	0.559863594	0.473420442	0.245782289	0.112554759	0.134551506	0.094729509	0.079472501	0.078077453	0.078312925	3.631630418	3.691923641	3.680446425	3.343143498	3.425938884	3.229578017	2.909016841	2.31572679	1.978209382	0.932043656	0.559556223	0.560001071	0.570810984	0.541685545	0.484988718	0.502838799	11.79970398	11.61308651
0.54070339	0.554408255	0.547149295	0.546771108	0.503728383	0.502668918	0.496605637	0.426732398	0.305052412	0.089101037	0.080854043	0.07950755	0.074700016	0.069985627	0.075019136	0.074413071	0.627014956	0.670930095	0.674658927	0.70564029	0.676442273	0.675845579	0.663352472	0.583588338	0.435608529	0.111833912	0.117652272	0.108327286	0.087989098	0.071099222	0.076986513	0.075577258	3.282371832	3.516199306	3.713761657	3.592669403	3.393438262	3.409873431	3.238619678	2.778242553	1.847507268	0.638676438	0.587896331	0.591731285	0.511953697	0.450636063	0.514450701	0.435279894	12.14646474	12.21706555
0.555695907	0.538485145	0.516659787	0.536332524	0.45110099	0.479076151	0.473868528	0.414324206	0.316010189	0.112023642	0.090253394	0.082732891	0.083614618	0.080275697	0.074168499	0.073783876	0.674296215	0.652192043	0.627170256	0.666482552	0.592881515	0.61898488	0.617712499	0.568341644	0.497916919	0.178570916	0.136300538	0.115820115	0.113612135	0.093461749	0.074338683	0.074838736	3.743044873	3.694287147	3.441543313	3.575777771	3.008748888	3.373069861	3.189834546	2.795536009	1.971191249	0.797068244	0.629258714	0.539690677	0.535849849	0.544333567	0.478466887	0.462977848	9.839130862	9.601278597
0.521350716	0.524702765	0.515109853	0.50565101	0.512055673	0.482164274	0.409418717	0.300851834	0.158625156	0.107296997	0.086078596	0.081386513	0.080199959	0.079590252	0.079671316	0.076996254	0.590209034	0.619527638	0.610378986	0.615087378	0.643349675	0.608591859	0.580310402	0.491571605	0.263951829	0.149104564	0.096250755	0.086089097	0.082082177	0.083406255	0.080595952	0.077935447	3.113453095	3.191004293	3.133327491	3.107672552	3.227171031	2.919420026	2.523537156	1.730737371	0.922025972	0.746164236	0.558343353	0.523324793	0.53058849	0.483192183	0.457984437	0.43620631	9.117900057	9.502063526
0.565004319	0.564027802	0.536610725	0.547284805	0.52008593	0.535129286	0.514308447	0.476783383	0.364886065	0.194074413	0.123672953	0.079337148	0.077941766	0.074321716	0.074990662	0.07456465	0.67107568	0.698383486	0.695340431	0.714997286	0.69045325	0.718248708	0.700264054	0.642053219	0.496440038	0.306107936	0.206969299	0.110512168	0.084568369	0.07566491	0.076808431	0.076013162	2.870172027	2.818315501	2.859239029	3.003288379	2.950601245	2.982437724	2.87863751	2.726832852	1.897350041	1.007193077	0.846112832	0.651388993	0.607004721	0.483497258	0.481232755	0.415773185	10.31062424	10.59768239
0.538964934	0.534101413	0.534261268	0.532357702	0.53585803	0.50894107	0.467905166	0.391123545	0.216768536	0.095500116	0.082620631	0.082408343	0.083064892	0.079448954	0.082416222	0.080837804	0.626564868	0.639161975	0.64293091	0.661112516	0.663445302	0.657789336	0.621965008	0.606303254	0.365184277	0.153461599	0.11747992	0.101777104	0.090980764	0.081351723	0.084105798	0.082543855	3.020168522	3.221715377	3.155727665	3.108635242	3.228047081	3.023528038	2.780029514	2.232388795	1.345586715	0.605142307	0.566048991	0.586506413	0.5909877	0.535063483	0.544743614	0.510403307	10.74051609	10.26658399
0.589441543	0.572481085	0.570344349	0.567012734	0.549507656	0.528158965	0.517283074	0.446370582	0.343766165	0.218503884	0.123572035	0.096872573	0.081559502	0.079685716	0.081420901	0.08046582	0.697607089	0.70382516	0.723279579	0.722455778	0.716216832	0.674138735	0.66713569	0.584243551	0.520464589	0.377933163	0.204237039	0.142450025	0.087696058	0.081091791	0.082238319	0.081843772	3.299681167	3.235393168	3.21448888	3.227533442	3.070348069	3.047046702	3.002067651	2.547718152	1.856832517	1.390279299	0.908144698	0.737271339	0.493763091	0.447148287	0.441255357	0.412526679	11.98221019	11.93197609
0.579426358	0.565436074	0.548850863	0.518961084	0.505609624	0.534688787	0.477237525	0.407052605	0.247206989	0.163461313	0.097052309	0.085827991	0.080522794	0.083600163	0.078144134	0.077806474	0.700517088	0.688181072	0.680606371	0.661704474	0.667619991	0.684093821	0.640695147	0.606006196	0.41861376	0.314812728	0.176040377	0.112063128	0.083575833	0.085370742	0.078755494	0.078725316	3.3327057	3.260814878	3.087368994	3.058362043	2.907944947	3.157328224	2.793766905	2.361645113	1.385902571	0.999600378	0.684958523	0.618123257	0.517564515	0.502906283	0.42158911	0.388483264	11.26400658	11.14766749
0.544152016	0.578006743	0.556359923	0.565015999	0.525855586	0.513836342	0.459030152	0.437903953	0.366619548	0.205749777	0.106084501	0.080303566	0.078252306	0.078527081	0.076158741	0.075855906	0.639197805	0.690547044	0.686171235	0.69875807	0.650080531	0.642995211	0.602528158	0.581917358	0.507641569	0.30852467	0.179643528	0.108951276	0.084695357	0.079445209	0.079679551	0.076837623	3.190232517	3.407756982	3.200340232	3.337917649	3.104258576	3.01293975	2.799003323	2.614782994	2.144536096	1.244885027	0.834098134	0.610299448	0.51476902	0.494372309	0.467058755	0.384986333	9.670697761	10.47766814
0.456239612	0.430693845	0.423281688	0.390279555	0.386617666	0.352850192	0.320661185	0.241501415	0.156241096	0.119898503	0.10201575	0.090097646	0.089597836	0.084931866	0.086498552	0.082783711	0.558377352	0.556930196	0.541249385	0.520866107	0.515728282	0.490109656	0.509137812	0.445305442	0.328258741	0.247557092	0.171447819	0.102047254	0.091519231	0.086299624	0.088091635	0.084498519	2.547172357	2.449895784	2.393118905	2.191171973	2.219989425	2.121488356	2.040710796	1.509194978	1.074785497	0.852366846	0.752915621	0.638984201	0.695828992	0.582987671	0.517598923	0.483055502	7.283087408	7.292957146
0.55182456	0.547848874	0.54186235	0.504188223	0.511461121	0.496177222	0.432390195	0.397462885	0.274939021	0.144675158	0.075231676	0.070996111	0.072843864	0.071513143	0.073875103	0.075125967	0.619439854	0.633041626	0.648910858	0.614244506	0.628720341	0.622819075	0.571109119	0.545003277	0.432032767	0.232293817	0.099769827	0.089875481	0.07766067	0.073300688	0.075740732	0.076497125	3.275340813	3.330981905	3.230619534	3.105347596	3.123662412	3.081728789	2.671388546	2.4082245	1.559231075	0.851448088	0.549519251	0.474449861	0.444511677	0.456226722	0.438173286	0.39233067	11.02230758	10.74155728
0.494315114	0.495835191	0.496634258	0.488298992	0.47625732	0.428698562	0.409447663	0.354839783	0.231306924	0.102706435	0.084051145	0.077382347	0.07473072	0.075069996	0.076867792	0.076067318	0.624495161	0.641635013	0.644888239	0.642613051	0.646874068	0.576907066	0.570251634	0.51873404	0.397873586	0.170951401	0.128725496	0.090153589	0.076917898	0.077900396	0.078448358	0.077752859	2.808921088	2.984222395	3.106476823	3.093753948	3.070034318	2.714640752	2.747974494	2.288095227	1.472879893	0.71844682	0.686812266	0.627136984	0.547578676	0.55262613	0.479485158	0.45729366	9.006479734	9.703671274
0.518083063	0.502098523	0.516164436	0.473099045	0.483414753	0.473440689	0.446367092	0.417333965	0.306621391	0.137330182	0.10534944	0.093511802	0.085346243	0.085965849	0.084669562	0.083743518	0.581748669	0.583000491	0.612542601	0.583943501	0.597854663	0.589267898	0.579620638	0.544351145	0.419506328	0.209821689	0.150215775	0.12154882	0.092277844	0.088605691	0.087460244	0.086633825	3.170758651	3.087555766	3.004235689	2.649739844	2.681008427	2.652743394	2.530313313	2.474813735	1.839538582	0.861196777	0.748452917	0.632032895	0.604827069	0.556271886	0.507865122	0.491438032	9.575310579	9.29931261
0.566000008	0.584510926	0.562652659	0.539758473	0.546297019	0.503560407	0.476670647	0.382494818	0.195192173	0.112480202	0.086659975	0.081275219	0.081709722	0.079052035	0.077896962	0.074748302	0.628054723	0.663941955	0.664836004	0.654550093	0.677085068	0.639066219	0.591903081	0.518531363	0.249769958	0.145342337	0.104589611	0.088819168	0.084633334	0.081109262	0.079463887	0.076270401	3.669336725	3.74665605	3.600734249	3.503495072	3.574324559	3.244727587	3.169728245	2.422433047	1.281094262	0.919817533	0.800328585	0.743330376	0.70810221	0.670923561	0.62467432	0.571858593	11.58036042	11.4725414
0.558461762	0.566993771	0.528459203	0.531955786	0.506244579	0.508136094	0.47866382	0.43882631	0.354812084	0.151600424	0.110630389	0.084036207	0.07796671	0.079768285	0.073522882	0.072990235	0.648221448	0.680048601	0.639934022	0.645245328	0.622003581	0.610205051	0.584005011	0.551368265	0.514550071	0.30060789	0.233308524	0.117235632	0.081498106	0.082085958	0.075288475	0.074108026	2.989258625	3.211641548	3.056987823	3.142409301	3.325092944	3.104969726	3.056059458	2.539399532	2.199365711	0.965919584	0.754109462	0.627283068	0.573686007	0.618267133	0.532241776	0.503285923	11.02674377	10.8503018
0.558484949	0.553825428	0.518032007	0.477462675	0.467103497	0.427597284	0.396790667	0.374185795	0.274265911	0.178561759	0.107193145	0.076426506	0.076890482	0.070960498	0.070338588	0.067638764	0.627765476	0.652712926	0.655109807	0.624216198	0.613422432	0.57626265	0.53672641	0.50723337	0.377000959	0.268826629	0.148691781	0.087609925	0.082140535	0.072751297	0.072112438	0.069460795	3.226557346	3.192674922	2.95523575	2.626377806	2.710547769	2.345573752	2.259015379	2.18905133	1.469210457	0.949706086	0.677062655	0.571027827	0.625451887	0.519512471	0.607898488	0.499855291	10.30329279	10.31499073
0.56581748	0.57863112	0.572222517	0.538118245	0.507945401	0.472981799	0.444674731	0.388076353	0.256016895	0.11078673	0.085186332	0.080154332	0.081569622	0.081142862	0.080451487	0.078331387	0.650746583	0.66816334	0.687219705	0.67259394	0.64210318	0.61249162	0.605028797	0.561344766	0.392688375	0.156876523	0.105040436	0.086990805	0.086926173	0.083450091	0.081576597	0.079441981	3.364458232	3.494040902	3.487633795	3.242731	3.078494095	2.974588805	2.739781677	2.1894084	1.537547725	0.667918912	0.552671068	0.512643275	0.48941794	0.470509506	0.444595536	0.397007797	11.18065481	11.39870216
0.546746303	0.543367426	0.524259454	0.526664782	0.503111371	0.491531871	0.473983316	0.40064564	0.234260641	0.129189983	0.097788844	0.085221593	0.08179346	0.080303042	0.080882131	0.080694789	0.650334892	0.686667345	0.683594004	0.70179234	0.684909224	0.674887258	0.645482835	0.561453004	0.323548025	0.163653227	0.125147584	0.09671933	0.087861918	0.08556061	0.087130706	0.086662559	2.903338526	2.795356295	2.791846615	2.870191469	2.781057096	2.7820655	2.563606726	2.170938956	1.284527941	0.862436233	0.680287686	0.651895876	0.620968965	0.609769956	0.576793612	0.554671701	10.40282904	10.22372361
0.416995034	0.417876725	0.412372331	0.384297604	0.385102854	0.310124517	0.271710711	0.238111823	0.139422493	0.092563835	0.076264529	0.079221846	0.079134897	0.076378235	0.073511976	0.072830678	0.536675954	0.525826986	0.53874718	0.550739486	0.531659035	0.468265846	0.437293306	0.423846293	0.231816345	0.114856785	0.081196814	0.084570025	0.081737683	0.080795427	0.075260526	0.074185138	2.418050368	2.419873858	2.424610803	2.287987477	2.338394588	1.83563064	1.60223098	1.490846782	0.92053569	0.557118871	0.489189025	0.550398947	0.546948272	0.666695782	0.476122299	0.419994153	7.729984036	7.702321377
0.561405273	0.561117483	0.569572379	0.547643116	0.50967024	0.507045967	0.471467446	0.356919369	0.216736198	0.095788032	0.081765501	0.083056154	0.082952025	0.081921137	0.082514124	0.081633628	0.617356542	0.638212239	0.670426341	0.655129461	0.616600572	0.644919733	0.615268977	0.542413027	0.338663233	0.119199187	0.100072981	0.094103403	0.087058538	0.084010258	0.084039897	0.083140148	3.251383285	3.230684686	3.180319398	3.256886063	3.004827487	2.879225966	2.677276944	1.852954052	1.196690152	0.579862878	0.559054632	0.55153103	0.556500886	0.49745872	0.480896356	0.453410095	10.61984649	10.98342878
0.509082562	0.547099906	0.524420656	0.514820074	0.494733675	0.486241704	0.455822657	0.388567667	0.181253967	0.101064882	0.077540402	0.074400786	0.071612384	0.072478602	0.072092281	0.075949811	0.639830825	0.689850491	0.686270582	0.687957352	0.670296629	0.694684573	0.669936427	0.584422334	0.30448051	0.168454895	0.109885332	0.087105837	0.074313888	0.073720514	0.074342078	0.077580779	2.669717722	2.980544287	2.912343732	2.883023351	2.788076884	2.807974974	2.649120378	2.172757371	1.053000707	0.760123231	0.561599613	0.520382175	0.504580443	0.492106608	0.47927757	0.477189169	9.345136462	10.07135166
0.539898348	0.556070374	0.563532946	0.551796627	0.543863689	0.500591986	0.468470963	0.433186913	0.29355333	0.136615997	0.073384347	0.074587117	0.073887972	0.072946772	0.072746276	0.070522423	0.628495665	0.660777712	0.673474233	0.677803895	0.689050392	0.641307445	0.645969345	0.632520802	0.502939431	0.233585787	0.085898148	0.082313541	0.080121603	0.074194971	0.073330276	0.072806722	2.870979822	3.028077486	3.089913098	3.07905374	3.10585863	2.862301375	2.584609266	2.320479148	1.5582475	0.818198929	0.544462823	0.55154027	0.483406169	0.421715725	0.433800562	0.367220681	10.50684935	10.90122557
0.525880934	0.521870819	0.521717382	0.464654975	0.478219295	0.462156818	0.355649006	0.325183991	0.164571005	0.089102106	0.083624943	0.082590508	0.08048741	0.078164741	0.079514743	0.078337619	0.598480302	0.646371521	0.630074464	0.614351943	0.657322666	0.629333305	0.573308301	0.527045302	0.276534563	0.125239501	0.094198511	0.086986346	0.08137699	0.078785613	0.080578548	0.079778064	2.828983686	2.912191586	2.785637491	2.75269262	2.90900492	2.731542547	2.078576244	2.048514563	0.98460138	0.628126972	0.688076894	0.633361728	0.563302157	0.48555306	0.512362244	0.420170592	9.865238083	9.349444979
0.5635431	0.571871072	0.553605983	0.538275484	0.524154428	0.513443535	0.454870012	0.284069137	0.170185345	0.074217018	0.071769943	0.068567784	0.069407758	0.070442408	0.068629838	0.068988988	0.671060035	0.709909495	0.700866927	0.699973204	0.681450851	0.679098479	0.633190156	0.452113223	0.26515935	0.110009498	0.098813311	0.074172863	0.072918564	0.071958623	0.070718785	0.071048956	3.121185149	3.231869706	3.275503196	3.251458193	3.128433971	3.079158772	2.707136185	1.642199604	1.035728495	0.537018998	0.504094965	0.477804003	0.489042983	0.434454554	0.404664602	0.3776032	11.18365676	11.33355894
0.552490654	0.531297065	0.527855316	0.495778507	0.487800461	0.46110805	0.342710039	0.269517096	0.16486987	0.096545121	0.089207166	0.077017733	0.075359985	0.076296023	0.077761996	0.075155116	0.666165333	0.672984531	0.679374469	0.645403415	0.647968291	0.614959397	0.52145703	0.459866009	0.272355823	0.177688061	0.173653485	0.10824451	0.089103259	0.082291807	0.083141281	0.077667186	3.108544795	2.914074446	2.922285234	2.885770356	2.801439819	2.522794808	1.92948759	1.539316257	0.994147812	0.684249407	0.603967562	0.635472531	0.593142223	0.618621257	0.620869755	0.449040859	10.42910482	9.614463287
0.558236936	0.543027729	0.537145987	0.545092336	0.548338595	0.551025451	0.525379689	0.468740856	0.364740054	0.201442255	0.078908885	0.078501204	0.081427962	0.079155301	0.079286273	0.077599817	0.642304021	0.657366922	0.673208745	0.700820883	0.70885631	0.725063997	0.682145207	0.599673026	0.480146689	0.299803011	0.080286188	0.079571585	0.08254183	0.080322151	0.079814912	0.078532435	3.008474185	3.015354374	2.98920943	3.151007622	3.200007395	3.342904046	3.152959015	2.783348839	2.126872861	1.301568215	0.637433246	0.678753166	0.725860461	0.580711804	0.493554764	0.43821721	11.11147765	10.86256607
0.491342076	0.465537995	0.527291991	0.518756906	0.499153759	0.451666618	0.47931941	0.437378469	0.314145778	0.189875545	0.121065203	0.084627672	0.083427737	0.082470692	0.082161905	0.080169269	0.599299291	0.58766861	0.67305914	0.664009245	0.634692961	0.580735079	0.620939609	0.593201356	0.457274242	0.359208728	0.266210613	0.133374911	0.09557853	0.083847222	0.083118491	0.083409732	2.56294796	2.649957117	2.983120944	3.030982231	2.971992182	2.731647851	2.891541272	2.85095046	1.998293747	1.307076231	0.899041312	0.621516267	0.576813705	0.626326084	0.505867836	0.545824479	10.36976316	9.501476467
0.517786946	0.524370923	0.508988645	0.513860498	0.477048278	0.474585291	0.39941312	0.285444941	0.126176689	0.081606575	0.071947583	0.071739471	0.07283462	0.072233312	0.071390657	0.070236878	0.609280959	0.638050823	0.649794266	0.665131123	0.628465395	0.624789969	0.57298042	0.402355417	0.171067061	0.096493872	0.081013335	0.075147248	0.075762975	0.073792096	0.072705424	0.072918206	2.987636554	3.025599752	2.92886905	2.97066393	2.951157518	2.772861593	2.404884556	1.716534856	0.900704462	0.596092391	0.61156485	0.55667676	0.463382497	0.489743441	0.41907259	0.390272496	10.09366936	10.56303068
0.537637096	0.542598413	0.536131439	0.513312398	0.504035256	0.498252535	0.475356688	0.370456084	0.255049653	0.127580835	0.08505185	0.070735608	0.069522322	0.068365073	0.069432216	0.069944122	0.626739895	0.66851308	0.690787934	0.676207112	0.681904084	0.664775199	0.654788942	0.616613539	0.424403592	0.210895747	0.123606767	0.083979352	0.072781887	0.070126543	0.071276577	0.073809521	2.889189544	3.04812965	3.002412283	2.822475091	2.821301142	2.751787291	2.703450358	2.114956718	1.36426003	0.85577449	0.53129815	0.490887203	0.460645443	0.467468142	0.449677429	0.465733912	9.386871172	9.230587053
0.470679067	0.499890019	0.467569426	0.485244128	0.465295357	0.449028498	0.4308117	0.356698791	0.217134824	0.10242998	0.09355387	0.083131683	0.078192841	0.079102998	0.079620847	0.077069681	0.544359993	0.601506	0.579495954	0.604528574	0.600888958	0.607331177	0.585439626	0.538168604	0.337595515	0.117911678	0.125609063	0.099720707	0.081991767	0.080674354	0.083673699	0.079019823	2.727357999	3.023252001	2.787188373	2.983639827	2.968826928	2.821366	2.785282545	2.27996082	1.459043586	0.846761302	0.713934828	0.569598789	0.600562915	0.544715234	0.537812564	0.441540725	8.796426531	9.823239768
0.533009776	0.537577988	0.520339259	0.51912171	0.509647003	0.491386727	0.468954491	0.377868381	0.291583416	0.117568668	0.07359095	0.071593479	0.069550295	0.069549485	0.068671191	0.068957856	0.622320838	0.663665695	0.674309288	0.666531072	0.681292294	0.669007794	0.644009495	0.56324649	0.485319791	0.189537617	0.090845609	0.082728726	0.074549683	0.073204485	0.070264858	0.070399718	2.888361798	2.985215653	2.965968347	3.00013002	2.8860902	2.689254945	2.618594777	1.971165219	1.450453405	0.74858533	0.51908418	0.546530881	0.47502372	0.462218964	0.408528419	0.376990239	9.607874141	9.40401223
0.585890776	0.573931776	0.537102243	0.527483578	0.525497234	0.506105949	0.411457154	0.268544895	0.128330226	0.090184382	0.088866975	0.084423902	0.08180873	0.079323292	0.080874329	0.081991234	0.684293269	0.704148397	0.686844487	0.679154957	0.67425786	0.673688463	0.636088242	0.526631706	0.328006154	0.18292713	0.15978825	0.129691386	0.091194566	0.082974727	0.08444282	0.085937182	3.404430876	3.275909652	3.154329964	3.179728553	3.176324581	3.107769081	2.41748294	1.544514273	0.745604309	0.6369405	0.624995342	0.572194393	0.564443475	0.491125097	0.494329641	0.525728216	12.14879912	11.77690777
0.535000178	0.542007334	0.546021388	0.537518435	0.522856521	0.464545695	0.318223784	0.153927637	0.079868393	0.072872657	0.083383389	0.073900885	0.071261524	0.070363028	0.070923171	0.066968586	0.678252209	0.659801549	0.677766267	0.680490855	0.662174241	0.590062141	0.432348121	0.214924665	0.112789601	0.090967715	0.135651931	0.117769554	0.089002244	0.072062525	0.071702696	0.067882266	3.486471817	3.435039238	3.630439145	3.58458316	3.313484527	3.001225886	2.088756045	0.968180467	0.53987082	0.531040593	0.654430219	0.548720927	0.554978882	0.564868612	0.551003937	0.538294294	10.36779574	10.94031876
0.50656712	0.4997069	0.470584558	0.483518031	0.481285189	0.476584062	0.435695813	0.413330388	0.32086512	0.222479781	0.120667767	0.082996549	0.075408234	0.074788118	0.076383838	0.074504741	0.616388554	0.638623293	0.614941957	0.641092295	0.638859081	0.632002035	0.609149062	0.582990041	0.477466173	0.323839759	0.205095895	0.121808933	0.083127643	0.075269703	0.077271182	0.075059849	2.797071009	2.818512809	2.667248347	2.779684071	2.961867299	2.890605073	2.757714433	2.5730771	2.031726599	1.336210878	0.849813203	0.62212017	0.513877477	0.485549649	0.462876098	0.406812951	9.958476525	9.554672768
0.51149542	0.5076721	0.496058482	0.496761076	0.498506268	0.478366146	0.416755178	0.341275369	0.186263577	0.091848443	0.076306702	0.075619194	0.07340836	0.074634205	0.076215574	0.072793328	0.627659437	0.630837943	0.641037896	0.647196604	0.665787196	0.640421922	0.608038024	0.514214825	0.269258161	0.132787685	0.088463235	0.082330281	0.075580853	0.076804249	0.077647692	0.074472232	2.867946283	3.011985392	2.815697801	2.772649206	2.863100686	2.743772183	2.348482154	2.020218725	1.099884858	0.625856082	0.546560193	0.570443806	0.496669287	0.464339646	0.567011453	0.410822259	8.826967683	8.388986347
0.547557807	0.524683102	0.519633569	0.505432155	0.44775215	0.464454488	0.417315128	0.382494388	0.232385511	0.155627867	0.104578469	0.102304123	0.097045099	0.09639712	0.096034411	0.098364973	0.644414959	0.657542443	0.698497969	0.706944533	0.700132949	0.70675128	0.681247198	0.579326641	0.418923399	0.290695851	0.195274347	0.151443227	0.103897917	0.098606185	0.097558049	0.101428957	3.110379738	3.059411114	2.953665248	3.083809681	2.550438097	2.728813412	2.521161694	2.337776881	1.683548026	1.050995856	0.874146781	0.75780061	0.877597612	0.707484286	0.687159149	0.690114853	8.921290525	8.803383999
0.498071695	0.516128388	0.517999362	0.517729112	0.507501003	0.477355243	0.441997998	0.278992115	0.150066361	0.091225613	0.082028724	0.080035698	0.078266356	0.076774989	0.076910464	0.0753109	0.57991833	0.639502689	0.648783694	0.652423165	0.646200649	0.642391629	0.600724028	0.451982913	0.24277862	0.122001231	0.109973275	0.093758608	0.082235845	0.077640307	0.078085486	0.076487011	2.747060791	2.893890376	2.927632278	3.004970362	2.932180596	2.79389152	2.696993988	1.722389573	1.083527455	0.814158887	0.60813	0.672857682	0.481559496	0.471541187	0.413180625	0.393116237	9.91576725	9.820648438
0.429501234	0.40260994	0.432081058	0.426019477	0.40249117	0.366054081	0.315778507	0.249035977	0.141990447	0.093677441	0.077701864	0.077775078	0.075426007	0.073357981	0.075683957	0.075222501	0.549521483	0.540267998	0.559019185	0.552521255	0.570868142	0.546362308	0.536254472	0.510261029	0.27507698	0.147266916	0.115397703	0.094846465	0.07931398	0.074614372	0.076827896	0.076478036	2.25875841	2.122880024	2.244745791	2.154514904	2.099998664	1.857210056	1.602628228	1.363740378	0.777684156	0.598275739	0.540937511	0.545449463	0.538903584	0.506730992	0.505286309	0.46298132	6.862035308	6.28794714
0.554239964	0.54877648	0.555922465	0.560367004	0.537412598	0.523592055	0.505129803	0.419957375	0.236624565	0.087720449	0.082378139	0.084384273	0.083625823	0.084358233	0.083520187	0.081179109	0.615477159	0.629616767	0.643711773	0.651055094	0.654691027	0.656072643	0.641681169	0.599285353	0.358999177	0.110292519	0.102886352	0.10354362	0.09161224	0.086536353	0.084915208	0.084543441	3.207996547	3.314550601	3.343122746	3.562710669	3.346728251	3.253706052	3.184305912	2.596414576	1.574451712	0.746575294	0.663058117	0.61479964	0.601687249	0.642438234	0.537512065	0.464437611	10.39737932	9.95012864
0.555045413	0.538299817	0.526771971	0.525688265	0.514498944	0.503132974	0.464998443	0.434445745	0.362116152	0.168419726	0.086952749	0.076314292	0.075020682	0.074116083	0.074202707	0.072440625	0.63781159	0.65585499	0.665125849	0.680062394	0.675252659	0.675908019	0.64654024	0.621572512	0.561044795	0.327453012	0.122731266	0.097574733	0.078684424	0.075423911	0.07516484	0.073684143	3.032627312	2.854367976	2.692375153	2.703130446	2.729555596	2.530516829	2.36712063	2.166165947	1.713974361	0.898109307	0.574485802	0.534622556	0.521259805	0.413818925	0.371713041	0.337029064	11.22902855	10.85136339
0.554989772	0.544763218	0.545330474	0.526240205	0.517047042	0.502798345	0.476755205	0.418035072	0.360824271	0.208061145	0.102990185	0.077457097	0.07706514	0.081025036	0.077229515	0.075829908	0.667562072	0.678449276	0.699869999	0.679760379	0.679149458	0.655503757	0.619764458	0.574410834	0.503182846	0.288953751	0.158501609	0.0960952	0.079125165	0.082586803	0.078305472	0.077208728	3.161627303	3.053422001	2.973659774	2.867257425	2.946378562	2.905594861	2.780343465	2.411053397	2.142650567	1.359283299	0.608050118	0.543739307	0.520391203	0.547619719	0.476089231	0.451606303	10.99378482	10.65112443
0.554584595	0.541361055	0.54119862	0.533161543	0.491914735	0.479171702	0.440367151	0.387960992	0.273909968	0.120215728	0.078503788	0.075194401	0.07637069	0.075855343	0.073679499	0.075673566	0.655176767	0.656150392	0.672986173	0.663980068	0.659513779	0.656830362	0.628657649	0.588224547	0.43616148	0.182737202	0.111241726	0.083021123	0.081285124	0.077721523	0.075426598	0.078196163	3.04753761	3.126945728	3.088441008	3.283392854	2.831978267	2.971813469	2.643699276	2.320010214	1.701226765	0.820366458	0.503714496	0.499466882	0.495381581	0.475899144	0.433922343	0.463423106	10.82960191	10.3039276
0.544250376	0.555447133	0.526346768	0.523590946	0.500522159	0.534362224	0.463795938	0.40776303	0.24334385	0.139911598	0.081286317	0.079106504	0.080976101	0.081752655	0.081651747	0.076916028	0.65333703	0.685767042	0.682886243	0.661578318	0.64979523	0.710571089	0.642460701	0.570043321	0.377816879	0.209416424	0.090744443	0.086192009	0.082539159	0.082913249	0.083563423	0.07962804	3.21589844	3.278046165	3.026797854	3.130964452	2.966211455	3.103020911	2.71725302	2.368430226	1.426036026	0.854440244	0.689835222	0.537288811	0.579241036	0.533397004	0.522173115	0.514242442	11.08654775	11.41794212
0.501676222	0.480349775	0.507478315	0.4867869	0.470015523	0.415803864	0.43377735	0.398509184	0.319275376	0.097380737	0.080316708	0.077118227	0.077500955	0.080237073	0.08114472	0.080682623	0.561436822	0.54782775	0.583858724	0.593578936	0.587675835	0.543264263	0.581201459	0.524439018	0.449167236	0.153011271	0.099327051	0.079257426	0.080011928	0.081933165	0.082529242	0.082360191	2.866772386	2.811011335	2.857111387	2.852671335	2.754544822	2.571853395	2.625572015	2.489824901	1.913318123	0.752788033	0.698094385	0.56826096	0.523440867	0.510128937	0.460183965	0.441237835	9.136611914	9.116180404
0.530218882	0.532894114	0.517665799	0.5163241	0.51886519	0.488770916	0.469368637	0.412220434	0.322364531	0.201946349	0.113173942	0.086890896	0.081937421	0.07975681	0.077578521	0.0739703	0.622499259	0.651107913	0.656837695	0.65424246	0.654591048	0.631093213	0.610891298	0.554336728	0.477193452	0.339246518	0.245401471	0.12991735	0.093493174	0.082276845	0.079389252	0.075566382	2.828832731	2.880791359	2.975311859	2.959462567	3.096162826	2.897681037	2.705495741	2.302640753	1.829518313	1.136317957	0.763069081	0.607065423	0.550755211	0.535790466	0.436889694	0.422092173	9.899668734	10.19044707
0.54930775	0.542479888	0.512512789	0.49481769	0.491299602	0.483071125	0.431481052	0.333678902	0.182239133	0.086822853	0.090422771	0.085200305	0.083828706	0.07982039	0.08043839	0.08120649	0.618979498	0.64775074	0.626338586	0.635640676	0.626179698	0.651262415	0.583066285	0.481213587	0.304315015	0.125334512	0.164402361	0.12708	0.110226141	0.085560637	0.081542743	0.08299625	3.163037417	3.354765077	3.071695782	2.963112884	2.952113256	2.770860447	2.611220356	2.078265944	1.155737142	0.632500146	0.624959768	0.606086604	0.578293088	0.547929864	0.501155102	0.448262607	11.06593255	10.59142844
0.489573148	0.466486862	0.459729473	0.445602684	0.439129594	0.437081283	0.431112619	0.346991951	0.251520339	0.105566499	0.088855762	0.084599872	0.080506399	0.081438534	0.083341798	0.077928283	0.553712455	0.532900349	0.527987697	0.523850686	0.543713025	0.584459702	0.597778083	0.529404277	0.424083269	0.18412305	0.153707313	0.101866101	0.084773799	0.083224545	0.084725897	0.07942297	2.62472136	2.663358874	2.370418713	2.437791243	2.369361136	2.382832597	2.263192211	1.829802447	1.523198756	0.711662968	0.599689898	0.604450593	0.618643109	0.588597216	0.582787698	0.492380177	9.590567763	8.819979823
0.568301433	0.588114467	0.550382672	0.558433059	0.541117938	0.544267924	0.508166341	0.494657835	0.387340536	0.124728852	0.087739271	0.07963486	0.078198945	0.07524684	0.077684803	0.075645753	0.660440433	0.687385736	0.674890636	0.701402091	0.687914802	0.698197965	0.656336072	0.638533681	0.496818677	0.178890756	0.115830792	0.08954303	0.083449993	0.077748455	0.079016623	0.077961231	3.124242665	3.333075662	3.050176859	3.152899513	3.035117294	3.083785639	2.759428529	2.731943355	2.111690713	0.711728858	0.666096916	0.661436183	0.586914985	0.504869016	0.529110777	0.408184762	11.21968898	11.9831503
0.606748488	0.600421077	0.5922451	0.610591084	0.573685181	0.577317317	0.548626286	0.473183111	0.382550211	0.240288207	0.14990651	0.097421622	0.085264039	0.083899965	0.080183247	0.08034407	0.689483938	0.700555842	0.702533123	0.735500368	0.715844856	0.714895948	0.685410025	0.654992255	0.539908356	0.401732922	0.258894147	0.154459877	0.100966046	0.088554402	0.08086562	0.081515389	3.549319124	3.67841312	3.584705984	3.803314368	3.635678812	3.766004922	3.422640788	2.884334147	2.387060493	1.43858178	1.143015993	0.615467264	0.537889675	0.485605165	0.418790603	0.431315423	11.56215559	11.45942604
0.540838981	0.530420377	0.54508622	0.543495342	0.537392793	0.505556802	0.508401404	0.430750346	0.255800545	0.130435568	0.085835662	0.084050752	0.084856819	0.083092724	0.082184298	0.080956287	0.65018467	0.675980353	0.701176918	0.700321232	0.70114725	0.68076639	0.682190661	0.608251124	0.383724711	0.203490146	0.104928613	0.095320248	0.088590766	0.085187076	0.083551749	0.082373573	3.063115936	2.917872874	2.985315728	3.09420935	3.095708435	2.951788895	2.978349917	2.430488711	1.508901956	1.081348835	0.856554596	0.85177552	0.876468194	0.80379758	0.598161884	0.500889333	8.916024012	8.879032618
0.486653488	0.516303986	0.492530735	0.476848292	0.467851398	0.44280629	0.424326328	0.414550089	0.37030516	0.192739604	0.097979513	0.091215884	0.084952672	0.083526719	0.082040946	0.080217057	0.616607517	0.670012359	0.676441478	0.667745637	0.677814829	0.652612085	0.641758775	0.618654584	0.554154997	0.300492072	0.163103905	0.132415877	0.0925051	0.087235909	0.083300549	0.081546587	2.625060893	2.827713621	2.635513952	2.561373013	2.512771788	2.497265706	2.407919533	2.14400488	2.0376538	1.165477326	0.651601657	0.663770118	0.61553203	0.610736843	0.434785224	0.415615884	9.139429147	9.940294155
0.518171079	0.520296461	0.531631172	0.523054988	0.496104165	0.461357806	0.450883501	0.368361488	0.264227417	0.119968267	0.076929608	0.068811617	0.068037976	0.065537228	0.065363475	0.064309018	0.627192734	0.67706623	0.682592057	0.695458626	0.666949975	0.655818174	0.658928447	0.568825298	0.37627057	0.191079058	0.105536622	0.084133331	0.070760381	0.066691529	0.066024812	0.065083098	2.776475426	2.713548121	2.930074049	2.902250917	2.851046125	2.479299192	2.422667799	2.02448299	1.333328663	0.635826886	0.48658029	0.414048539	0.443260026	0.339542025	0.310932786	0.323434799	10.30122899	10.19682966
0.538472362	0.532915017	0.510190835	0.493447316	0.471931792	0.469976854	0.422444541	0.426256068	0.346896888	0.166998086	0.08264591	0.083565799	0.084353795	0.082077935	0.076855846	0.076289627	0.654994683	0.68148325	0.679526927	0.648060076	0.631546439	0.639537556	0.592709182	0.59936975	0.522071907	0.267664563	0.107060337	0.094899394	0.09397585	0.084457999	0.079092774	0.078516233	3.005367414	3.145393562	3.023400917	2.934878623	2.928341263	2.891886701	2.499279023	2.593924347	1.896202587	1.071139393	0.67068523	0.615301835	0.648107975	0.541729021	0.456043587	0.460590289	10.71854583	9.906051958
0.553084514	0.527117672	0.540356826	0.547090189	0.499812211	0.505939914	0.463774143	0.346826634	0.214803615	0.117048297	0.081599983	0.07252002	0.068652081	0.069870259	0.071403859	0.074377229	0.62193468	0.607222712	0.640491723	0.656467793	0.614998491	0.620735888	0.598395242	0.4793682	0.357811752	0.201447295	0.14371713	0.09731184	0.07448609	0.074775904	0.07382028	0.077379556	3.173939133	3.007417919	3.155050823	3.280783911	2.854986931	2.956599924	2.685427733	1.871640331	1.263203008	0.755224825	0.55165516	0.51860942	0.534114445	0.420519516	0.435156728	0.420140462	10.84828043	10.69221077
0.622487213	0.588753374	0.569060236	0.556533246	0.541581637	0.496836322	0.53902914	0.44658185	0.296626401	0.117709255	0.079870902	0.071999994	0.073634809	0.073195816	0.074121125	0.072540306	0.690451598	0.666016551	0.648152066	0.651301525	0.653421249	0.612884854	0.655351298	0.560799959	0.386629501	0.142782143	0.105735388	0.084958791	0.080337003	0.076627337	0.076034494	0.074195248	4.021480467	3.906700071	3.799266148	3.692222031	3.464781844	3.16993681	3.582926342	2.808226717	1.786429939	0.793875235	0.540359637	0.494325049	0.491362214	0.488393705	0.444137882	0.409061855	13.34178599	13.02086294
0.52596615	0.552130143	0.508339817	0.487370091	0.505107908	0.487167418	0.418668896	0.40032228	0.213742837	0.09703011	0.073583536	0.071978215	0.070569044	0.073160973	0.069433405	0.069697502	0.624720533	0.678868127	0.654988827	0.64526783	0.654655024	0.649709316	0.60781324	0.579616485	0.311556319	0.151338065	0.106484458	0.082234029	0.074254878	0.073797788	0.070512359	0.071126866	3.091899931	3.416350966	3.120064706	2.995170581	3.183279499	3.005755818	2.647535954	2.434479837	1.422922292	0.652107763	0.527627324	0.503064421	0.491140349	0.589879164	0.455832727	0.374244126	10.59897982	10.73983205
0.499645102	0.510960884	0.504133453	0.517568124	0.498771989	0.473166614	0.448092377	0.367963622	0.237025202	0.109329438	0.079342327	0.079597126	0.080695085	0.082057709	0.08359223	0.074905452	0.608190979	0.632861065	0.659356191	0.675713744	0.675407892	0.656999555	0.634194608	0.504052702	0.360227366	0.165014458	0.088841044	0.084834767	0.082643357	0.083540291	0.085735432	0.077051841	2.725800308	2.94374593	2.876570258	2.971983995	3.022115174	2.789120539	2.623005292	2.235020958	1.382751611	0.706209702	0.548852124	0.512252097	0.535310808	0.516074143	0.4989154	0.394301134	8.910968306	9.009195718
0.572592317	0.578305816	0.555193695	0.560803616	0.546372027	0.525527544	0.440735189	0.293990888	0.164154563	0.100657955	0.080222234	0.077748502	0.076791982	0.075972997	0.07496574	0.071719035	0.686841688	0.701962709	0.697002727	0.71990233	0.691460114	0.700866574	0.595468879	0.41325639	0.228279999	0.132031428	0.096906191	0.088477175	0.079530223	0.078319235	0.076583962	0.072944626	3.514038089	3.674319822	3.458311018	3.439447424	3.48507402	3.224991483	2.680659915	1.772881561	1.021989041	0.714318849	0.533647549	0.47422427	0.476400233	0.505331216	0.406500366	0.375085098	11.27972536	11.45358961
0.55282402	0.572879366	0.545935107	0.566245925	0.498464085	0.467308674	0.473687888	0.420708245	0.281094566	0.121851956	0.095184631	0.081648685	0.077368508	0.080020879	0.076637201	0.072202721	0.670816751	0.711125333	0.699864733	0.727055968	0.656598051	0.626496261	0.633122468	0.592076449	0.405701235	0.211651405	0.147806058	0.098292897	0.079938015	0.08141917	0.077556444	0.073333125	3.098435001	3.043601045	3.023689398	3.173510681	2.944964452	2.787284166	2.635664129	2.38803811	1.643347181	0.81052057	0.663541761	0.547013005	0.494766443	0.453525726	0.424435132	0.371577038	11.3669036	11.91993983
0.587083998	0.580972938	0.554651772	0.546920323	0.527667132	0.54877456	0.530457807	0.480972838	0.423602531	0.148750827	0.095549977	0.093766084	0.09184946	0.086151865	0.088135365	0.085528365	0.677733881	0.691706376	0.683941332	0.705924276	0.682633416	0.696751035	0.697958906	0.660531805	0.602327073	0.252444394	0.132433972	0.125671411	0.097842754	0.08746982	0.089228608	0.086550278	3.499308294	3.434543604	3.275464793	3.248729336	3.228338961	3.379555651	3.189174402	2.772360996	2.386981138	0.992536548	0.685103276	0.708818762	0.766104557	0.581937483	0.505684154	0.453819918	12.03987072	12.07254296
0.53390379	0.542852487	0.534992516	0.489592096	0.490079951	0.430173106	0.346958051	0.365190891	0.305956923	0.143244139	0.099686045	0.097922475	0.093256359	0.094448052	0.095120313	0.08774109	0.641263068	0.670758724	0.677821075	0.644702207	0.640412918	0.60009642	0.503185673	0.51283831	0.48460902	0.258447557	0.121162965	0.108423296	0.09623915	0.096016653	0.096417451	0.089044731	2.998756453	3.070382872	3.141173952	2.776254041	2.877577239	2.608198828	2.194668755	2.317461066	1.707082284	0.945989332	0.708169373	0.679405784	0.614804339	0.59774082	0.579804779	0.494815284	10.5379365	10.33776399
0.531192303	0.527691655	0.527070251	0.509246425	0.497671489	0.482106772	0.481868157	0.436611442	0.266898206	0.127000841	0.086427086	0.077425789	0.075096401	0.074379101	0.076795352	0.071836356	0.630573038	0.647485386	0.666411142	0.666360335	0.654251419	0.63742083	0.620232578	0.591403317	0.394989661	0.221398247	0.132090248	0.088507238	0.076350347	0.075043252	0.077974399	0.073986919	2.841408452	2.998227238	2.991018926	2.838769379	2.9916389	2.860063119	2.805756482	2.463079297	1.476637104	0.694945762	0.567647391	0.453371162	0.428045287	0.405795163	0.427370901	0.360365205	10.34198867	10.30530849
0.522200841	0.515997003	0.505554644	0.469388734	0.445212651	0.414944739	0.351987767	0.412432795	0.307321479	0.145675823	0.082678819	0.078862529	0.083608112	0.077543089	0.078713019	0.08046402	0.622241749	0.630190042	0.633824712	0.610874081	0.570806732	0.548476105	0.478514297	0.571098331	0.465386255	0.223120987	0.124157373	0.11440058	0.090112274	0.07837725	0.080337682	0.081921255	3.09532594	3.046705473	3.056922361	2.975055909	2.842230611	2.615472192	2.30201984	2.648637746	2.021553809	1.049409632	0.662958776	0.610043618	0.696444763	0.568458016	0.615693944	0.600913899	10.40062607	9.942692214
0.586871375	0.582244499	0.579216479	0.571037728	0.540563074	0.501445855	0.445501101	0.364883297	0.134158577	0.081990359	0.078910978	0.076918086	0.077273635	0.077400019	0.077476095	0.074329653	0.672456993	0.697465279	0.706553527	0.696762479	0.664832113	0.621347604	0.587385859	0.561908072	0.240678686	0.103364792	0.100642923	0.083400541	0.079515069	0.078547287	0.079058875	0.076105251	3.31953777	3.329544097	3.363856592	3.311155565	3.302592765	3.012476671	2.565141481	2.241206022	0.772266373	0.576582831	0.535068209	0.500507689	0.467968549	0.429526756	0.416027402	0.390877387	12.45108043	12.32349706
0.459184435	0.472144735	0.467364882	0.443919656	0.447362355	0.403234307	0.343125	0.251891898	0.151536629	0.084091441	0.081159847	0.081472894	0.080539732	0.078682316	0.074618884	0.072885152	0.575827168	0.607401412	0.625762914	0.609279452	0.616873507	0.617809136	0.551108951	0.411334165	0.212723493	0.118429221	0.099704454	0.100806701	0.087086236	0.081548514	0.079088711	0.078934808	2.618310084	2.799557515	2.663943323	2.584551923	2.682660038	2.447865466	2.124439659	1.486959485	1.111189234	0.783299278	0.716056994	0.651511423	0.697197144	0.630180376	0.586970168	0.571244756	7.824267487	7.56665861
0.491414603	0.506129343	0.501989851	0.476700027	0.483862382	0.480117967	0.444478617	0.391436889	0.294301021	0.083966205	0.07948133	0.075308433	0.079087005	0.07925303	0.07613719	0.079260591	0.594250214	0.61587025	0.631656502	0.595558494	0.623254802	0.611956659	0.582506057	0.544132472	0.401644153	0.096713621	0.086893278	0.07850227	0.081199343	0.081434805	0.077792137	0.082296311	2.678255619	2.823121438	2.840577859	2.655934558	2.900446973	2.868724098	2.574742871	2.141060902	1.605364258	0.516148449	0.547739927	0.518024539	0.594028655	0.543340869	0.410837467	0.477638131	8.956309024	9.501030737
0.583737334	0.565679194	0.544011164	0.506243929	0.509687869	0.476754217	0.44617049	0.318096595	0.184441226	0.106972366	0.08169654	0.076115199	0.075939319	0.076098679	0.077741261	0.078796383	0.669846899	0.672622848	0.664735924	0.664181929	0.657370902	0.649719447	0.631080177	0.460596849	0.27823232	0.155904261	0.107729137	0.086921023	0.078593257	0.077696242	0.081963243	0.081801508	3.461290603	3.446852539	3.397153944	3.161359724	3.1365665	2.937185922	2.747545009	2.033725374	1.246166088	0.688999091	0.51796156	0.509659967	0.491126494	0.459096468	0.429100496	0.50550668	11.91411628	11.56056545
0.586250756	0.602509898	0.606909472	0.604392762	0.578324075	0.588478969	0.519537455	0.488904334	0.31297123	0.126545757	0.090723793	0.078533605	0.075239047	0.072452589	0.073207662	0.07232185	0.657301167	0.686055693	0.696446272	0.71115327	0.692394536	0.697564199	0.641421955	0.637842246	0.483529273	0.194268244	0.130287238	0.105608019	0.080669457	0.073136071	0.074236757	0.073683952	3.376611775	3.578393461	3.64317335	3.626231506	3.380407033	3.489183325	2.954432876	2.817932609	1.70072375	0.77059969	0.55875856	0.548574497	0.528105	0.457293635	0.476204937	0.419681462	10.80416907	10.82598627
0.522020583	0.495268396	0.480260299	0.480914767	0.453117221	0.405108548	0.364450642	0.222378259	0.093376862	0.093596204	0.078583194	0.078848521	0.075864327	0.075069943	0.075518959	0.074667827	0.61405069	0.612314559	0.611165132	0.637869785	0.626024429	0.605209849	0.582116593	0.461084328	0.182189754	0.179450865	0.125665284	0.096791519	0.080574028	0.088774989	0.076827209	0.077862214	2.784196404	2.79983215	2.771712469	2.772909305	2.703289513	2.50250767	2.194023753	1.510374481	0.900205877	0.867876121	0.709534755	0.624596864	0.649007891	0.504688269	0.529021718	0.487258277	9.455488295	9.30901252
0.54662747	0.576571993	0.571714091	0.571852168	0.560416482	0.562120187	0.528495947	0.446572996	0.32626546	0.14673848	0.083912459	0.072056111	0.067468496	0.066897843	0.064104951	0.062172794	0.651592524	0.692046054	0.719616018	0.715434359	0.722542928	0.720596264	0.70145162	0.596000425	0.484079058	0.259818934	0.184190547	0.118734202	0.072157396	0.069170728	0.065334498	0.063448638	3.075873944	3.368175017	3.482558067	3.562291061	3.523674852	3.454486758	3.171095121	2.625537672	1.873252588	0.944028578	0.648608088	0.553134416	0.533344419	0.446155652	0.432551695	0.301858169	11.06942288	11.8236341
0.573781044	0.593023591	0.575355561	0.571634667	0.557821606	0.55808508	0.509602806	0.47664668	0.229361124	0.205720034	0.099279665	0.081904279	0.083039566	0.080825541	0.083293891	0.079606978	0.714308881	0.746012497	0.734938637	0.730421948	0.718279176	0.727200407	0.658762743	0.626615544	0.339325808	0.318840118	0.171923423	0.102278865	0.08735025	0.082147196	0.084889833	0.082546188	2.901420658	3.132456055	3.317911647	3.462272349	3.435086684	3.422075433	3.185066503	2.956390939	1.484246527	1.219061218	0.773849354	0.693401139	0.586699223	0.527238691	0.535396601	0.554139514	11.54510423	12.05496324
0.545266806	0.547313721	0.552754726	0.538305778	0.518706044	0.473929868	0.431499274	0.370188981	0.221932119	0.09723539	0.081676363	0.078340014	0.076437497	0.077764831	0.076186542	0.076966281	0.609300689	0.631323886	0.666329476	0.681375858	0.70307843	0.677525312	0.703127022	0.599027726	0.459936579	0.19091032	0.135711446	0.111449594	0.091517609	0.081276397	0.077385207	0.078540563	3.121201975	3.184226607	3.329382242	3.114899653	3.160348762	2.722078739	2.469756729	2.234138094	1.437787021	0.878666847	0.63367212	0.596140218	0.548200286	0.546705969	0.489399015	0.51191916	10.57943566	11.25669466
0.505039282	0.509473448	0.489237626	0.44251868	0.448046243	0.395314157	0.337946075	0.255982638	0.159580417	0.121997721	0.090671006	0.085691905	0.087914667	0.080888899	0.078821279	0.072194158	0.642353724	0.629543845	0.615025878	0.596063174	0.632838764	0.60745927	0.596287942	0.507359818	0.340137127	0.223060342	0.168803348	0.103875987	0.094294989	0.084189389	0.08010164	0.073507221	2.818541296	2.952721373	2.728062961	2.68679209	2.776577577	2.382486996	1.975768182	1.530150365	1.085115054	0.897627801	0.810468	0.748083812	0.750464645	0.656858814	0.625658046	0.433609106	8.133341375	8.202387451
0.546783898	0.534302366	0.529172153	0.523168613	0.517351291	0.541245929	0.494898569	0.433678894	0.31935355	0.21307848	0.117740655	0.097828365	0.08425569	0.079970885	0.078617242	0.07744909	0.615282709	0.604176776	0.631570058	0.648822889	0.648094815	0.646705398	0.661596894	0.606263656	0.552769827	0.341719442	0.201077673	0.164123209	0.11368655	0.082459686	0.080248632	0.078753221	3.16679433	3.177293605	3.310754838	3.37815395	3.340129956	3.591490805	3.197916584	2.730748524	1.881427559	1.421472744	0.883042973	0.715280996	0.589921992	0.542654185	0.51492903	0.443330514	10.34908991	9.764499454
0.558616897	0.562179759	0.570372349	0.57012952	0.591671889	0.592182743	0.546162057	0.486528736	0.311221376	0.111043878	0.077670378	0.084282785	0.070985326	0.070918595	0.070090137	0.067867256	0.645273131	0.691391748	0.730623566	0.742909098	0.752491515	0.758061335	0.715830343	0.642377039	0.416283007	0.155228987	0.092730384	0.095713104	0.075377305	0.072400617	0.071370112	0.069155874	3.442334762	3.476188583	3.497738718	3.686995464	3.954248861	3.814273141	3.621827836	3.174313578	2.028493141	0.844598966	0.607999602	0.58341439	0.491589461	0.544366921	0.46509855	0.426291748	12.20553019	11.80229337
0.520787861	0.519285041	0.51963303	0.502157773	0.499134486	0.523440473	0.459151723	0.369536291	0.188883441	0.082425549	0.081843281	0.081528816	0.079572291	0.075697533	0.08117815	0.077676745	0.619245887	0.635001941	0.663570584	0.63862247	0.631468777	0.645250375	0.625657851	0.5063497	0.263860703	0.1020386	0.100224729	0.088662257	0.084885216	0.077746885	0.083082883	0.079507843	3.025900349	3.074195857	3.101875294	3.056424379	3.201121628	3.318786189	2.762510843	2.343669922	1.184017698	0.589706159	0.592224914	0.594806172	0.520529206	0.508813451	0.534763876	0.465883339	10.16502139	10.18561755
0.544504622	0.559517849	0.52826376	0.531928311	0.558751363	0.48625564	0.503242023	0.408173977	0.228933127	0.113194809	0.092917335	0.087322775	0.088571931	0.091588435	0.09086184	0.089403871	0.674708916	0.711422764	0.668693104	0.70055381	0.723341696	0.646981171	0.672476478	0.557739886	0.357217834	0.190853193	0.128067132	0.101731342	0.095003938	0.095590969	0.092496262	0.09156043	3.114976955	3.366827327	3.265484757	3.392073734	3.503031916	3.173291167	3.21019425	2.601144586	1.454725192	0.771321813	0.7410263	0.659059646	0.683392244	0.635485069	0.545656309	0.559932935	10.01444648	10.10325236
0.585543849	0.563036209	0.565028823	0.538935131	0.494406236	0.495978797	0.460117852	0.434128462	0.291119046	0.162809306	0.110586817	0.078167446	0.076535192	0.076280763	0.076664924	0.072611306	0.686347436	0.690982294	0.702755569	0.67537644	0.639133603	0.64348442	0.623765771	0.58680705	0.450186916	0.239847682	0.16724825	0.09232522	0.077458687	0.077473082	0.077948773	0.073780294	3.313326313	3.305554708	3.312734886	3.239035177	2.976735528	3.106066099	2.633033907	2.590139064	1.703305984	1.000309325	0.726512378	0.624303444	0.535653129	0.475250292	0.484468896	0.415640228	11.1960322	10.24492698
0.48347068	0.496309447	0.50010674	0.452322765	0.454298749	0.432376426	0.348410206	0.311114337	0.136388502	0.075209356	0.076800208	0.072583299	0.073339811	0.072164271	0.068180579	0.072390895	0.612293848	0.650540592	0.673243675	0.648320885	0.635972433	0.643073982	0.587235606	0.494715795	0.203636724	0.102406637	0.09619764	0.085034322	0.081199235	0.074832482	0.069228424	0.074475395	2.674190929	2.821271735	2.909484371	2.574665133	2.654774473	2.527484412	2.135842466	1.91961503	0.902116081	0.687732105	0.691822477	0.602075029	0.630519888	0.600412186	0.459687913	0.536085641	8.98193699	9.506640231
0.511845595	0.514687513	0.507484771	0.524617692	0.49633966	0.487730863	0.477016869	0.426201274	0.321103854	0.146918801	0.100366634	0.072717466	0.070343118	0.070310215	0.069040197	0.071022767	0.621429318	0.648969423	0.65275926	0.677165245	0.647809287	0.63790612	0.636518404	0.57122046	0.443993162	0.251038065	0.20383146	0.118718152	0.07881277	0.071686396	0.070570226	0.073242527	2.709727435	2.790129071	2.796670312	2.875816393	2.826248733	2.732840997	2.727403832	2.338706899	1.81958684	1.05293262	0.627852209	0.54573791	0.510528252	0.424893244	0.454930158	0.391854935	10.11146126	10.38925516
0.54633047	0.549832817	0.553980035	0.559641344	0.575831647	0.555284258	0.541145338	0.499986933	0.407502723	0.202604847	0.091025288	0.07914175	0.076718418	0.078018667	0.077873758	0.07696223	0.635038599	0.67393422	0.690579582	0.707115753	0.730089265	0.706907602	0.686506414	0.624473942	0.54825279	0.295073723	0.129258696	0.091327175	0.084529103	0.080888004	0.078912369	0.079300799	3.017678794	3.054992119	3.216807488	3.224365313	3.36420204	3.38610017	3.236140586	2.863842159	2.201998993	1.156003979	0.642013439	0.623846075	0.528752906	0.507671607	0.460662472	0.469648692	11.11390382	11.45051657
0.535041431	0.56021471	0.53936809	0.501755287	0.470825853	0.460471901	0.436715054	0.379502776	0.224456247	0.139819604	0.093788647	0.079287873	0.08443203	0.081148114	0.082844205	0.082861345	0.611434749	0.674956764	0.664700057	0.630697814	0.612039381	0.597817027	0.57511725	0.514780667	0.341696587	0.206634823	0.135334147	0.089045945	0.088832025	0.083608423	0.08502044	0.087611013	3.019366809	3.156871272	3.135882887	2.951041508	2.768185963	2.641057867	2.388549983	2.069932368	1.388241919	0.892902753	0.64788023	0.64396744	0.605494101	0.502557841	0.483985984	0.571667908	10.5227365	11.46954413
0.545614197	0.570986473	0.552118833	0.547627683	0.520026334	0.479274896	0.470212003	0.422777384	0.273068316	0.128834028	0.094479416	0.089818636	0.084633835	0.082935975	0.083133216	0.084535208	0.623164769	0.676732838	0.672440132	0.683968373	0.674828663	0.623104899	0.609116307	0.556622726	0.419073372	0.203322112	0.158240886	0.139858512	0.098807068	0.086535491	0.086171174	0.088336419	2.940632115	3.11755895	3.14826269	3.126458945	3.027768717	2.791542157	2.702969787	2.428162288	1.575602663	0.859723467	0.729685039	0.69578862	0.627320403	0.593667922	0.523911717	0.525785555	10.60614897	10.69371648
0.581277805	0.569835664	0.574568831	0.54743906	0.533473508	0.494027122	0.473181769	0.315805438	0.193986685	0.096555257	0.076126433	0.077035337	0.075120751	0.074303718	0.069181383	0.068088023	0.668796185	0.688757098	0.721230226	0.698861236	0.696761609	0.646227962	0.639275316	0.461668581	0.316525254	0.115501612	0.095267915	0.090528674	0.081973076	0.076316881	0.070621051	0.070254919	3.195991145	3.353559046	3.335485746	3.107239215	3.219328889	2.950501725	2.719925642	1.764187805	1.064326764	0.681008657	0.607002722	0.563621069	0.604612372	0.504530995	0.425889685	0.385206357	10.37035755	9.95877929
0.532218879	0.542027661	0.509456176	0.488288408	0.484902451	0.458621493	0.428600847	0.294513774	0.14323269	0.085797064	0.080471447	0.07879586	0.077763138	0.078076942	0.077627201	0.077403164	0.628778879	0.66370396	0.662799999	0.657041576	0.662829896	0.651493819	0.652742381	0.507022259	0.232694821	0.101178302	0.094870691	0.087720333	0.081342985	0.07904744	0.078376237	0.079996989	3.297406225	3.497077924	3.205824038	2.962379167	3.070283677	2.787257751	2.587469191	1.662736287	0.998083797	0.628591414	0.564520442	0.534720003	0.545233589	0.457219853	0.448753522	0.493453703	9.393409969	8.967853829
0.571038688	0.572411514	0.59143676	0.554075473	0.576546531	0.524318711	0.49637269	0.44210621	0.287689829	0.170052318	0.103304081	0.091751445	0.079499616	0.086100834	0.08247922	0.079458004	0.680612381	0.699117553	0.734789933	0.702990032	0.722887271	0.711175747	0.66815015	0.611434703	0.429306642	0.270694484	0.194172272	0.117124852	0.083033461	0.087796355	0.08447235	0.081749624	3.375881726	3.398315257	3.511034704	3.397813469	3.696995547	3.235060909	3.085746859	2.674892974	1.865359214	1.017549216	0.671168779	0.644653702	0.552348289	0.554712523	0.555889765	0.518215585	12.67087998	12.67479567
0.520938129	0.505281719	0.533745725	0.550683986	0.504926435	0.514043624	0.490937096	0.374374208	0.267735848	0.112565309	0.081445557	0.070839139	0.069554255	0.070531624	0.070356827	0.068231145	0.588421013	0.604111415	0.649811686	0.687731496	0.655710747	0.679379396	0.654940287	0.576545747	0.419409349	0.193555895	0.134671841	0.096998697	0.074591581	0.071589896	0.071060619	0.069996167	3.109377974	3.119871503	3.431718982	3.497874062	3.171047512	3.13499443	3.096063429	2.215185619	1.641715639	0.834158032	0.711637342	0.539904955	0.488643787	0.458841542	0.471201806	0.406045051	10.05294487	9.671428741
0.507226695	0.505774236	0.519057353	0.500219075	0.45820008	0.446078965	0.464066455	0.326681156	0.182410316	0.099599616	0.082408019	0.075152369	0.073031374	0.07423159	0.072663948	0.072202722	0.639243003	0.636147102	0.668253778	0.66232321	0.629816805	0.650671701	0.667422017	0.522672032	0.298288754	0.166289846	0.142288182	0.093783057	0.077046485	0.078206224	0.074161159	0.073789679	2.901418279	2.862495618	3.005463048	2.98351119	2.891081673	2.906715427	2.964969855	2.113537607	1.491744396	0.764652981	0.639992702	0.612531638	0.635368613	0.508659619	0.441129215	0.385630436	8.846547573	9.222874092
0.599146643	0.618931026	0.626249697	0.588131617	0.54509039	0.504771929	0.482741581	0.299701	0.133454348	0.12116244	0.086403954	0.082398662	0.078692924	0.076315899	0.07724668	0.076868324	0.690732483	0.722062122	0.743598267	0.70444216	0.685308542	0.630609759	0.599436888	0.398645688	0.193051008	0.185608948	0.125442298	0.104882121	0.082184576	0.078790247	0.078573242	0.077873728	3.425962174	3.5567079	3.648780478	3.579991797	3.329625622	2.93095703	2.815125562	1.85146235	0.833353049	0.909882884	0.716363763	0.627546306	0.611578733	0.494024311	0.556143516	0.502953897	11.82520715	12.5209104
0.562474812	0.537672043	0.543328325	0.531702516	0.504742585	0.493986195	0.468407904	0.399387733	0.312947711	0.198586262	0.084996966	0.083304788	0.082877179	0.08086564	0.078817934	0.079641578	0.674580183	0.666191546	0.700001179	0.704787062	0.679910354	0.657011772	0.642290865	0.566566975	0.434471592	0.303597576	0.10294784	0.092527673	0.084649679	0.082876902	0.080125361	0.080905775	3.183149691	3.144850877	3.072360017	3.087306277	2.934207564	2.974953406	2.777460383	2.449016768	1.938089715	1.172527515	0.674650943	0.715773301	0.61936029	0.578910746	0.480995587	0.451410945	11.46769355	10.98649651
0.546275797	0.531659435	0.555361004	0.538355717	0.51486556	0.515804972	0.479226861	0.411732717	0.319104536	0.129442449	0.085359519	0.079542246	0.077977544	0.072566202	0.075040291	0.076932009	0.631048958	0.639053855	0.680338771	0.673185303	0.653631489	0.648670629	0.611975373	0.537689709	0.432624867	0.190868837	0.107996707	0.092674884	0.081108053	0.073425644	0.076458013	0.078663781	3.103007094	3.200209408	3.377299054	3.207175601	3.228819023	3.126522517	2.913218094	2.434616454	1.984688751	0.948113041	0.670889511	0.581258395	0.543086642	0.437993902	0.479715391	0.474063479	10.47775413	10.14793701
0.502320606	0.509597124	0.51323597	0.503727439	0.49451361	0.446320728	0.420724371	0.387269069	0.25517365	0.075708698	0.074481173	0.073337124	0.07389478	0.072752126	0.072345206	0.073474294	0.619347016	0.631497514	0.656134122	0.655275254	0.649335661	0.591910549	0.583289895	0.565165755	0.381820193	0.091982022	0.098156979	0.077330935	0.075223109	0.074159945	0.073981345	0.075068898	3.065804609	3.138339131	3.159793473	3.07876595	3.194156999	2.925147863	2.68487858	2.420401332	1.585577377	0.575367548	0.576320632	0.539342997	0.524451391	0.4989337	0.52612937	0.469202811	9.426131953	9.667893461
0.560924216	0.579658567	0.55746412	0.557421848	0.521687946	0.522300119	0.505135066	0.444435795	0.276444064	0.125335693	0.089921128	0.08226284	0.076714919	0.075904619	0.073919046	0.069681165	0.642473254	0.686266129	0.676538276	0.693146874	0.66279536	0.669269027	0.64682911	0.591651927	0.381021335	0.188538389	0.148530225	0.130275088	0.089748367	0.078660235	0.074658032	0.070765085	3.128434367	3.284092744	3.133489345	3.199912599	2.975145754	2.999907518	2.882493625	2.474964944	1.498482287	0.699609576	0.551825413	0.549990374	0.46458612	0.470720747	0.481182007	0.355607801	11.43226114	12.0384213
0.466532743	0.507765596	0.510724912	0.501961966	0.497862617	0.461364043	0.426358371	0.34810766	0.189720761	0.079525163	0.078838667	0.076876136	0.078212596	0.077592055	0.075396047	0.077232735	0.525843873	0.603790649	0.633477741	0.629697877	0.653067357	0.65909958	0.647236154	0.579585142	0.327896382	0.098987144	0.129834451	0.101672282	0.084608534	0.079097823	0.076559532	0.078196607	2.623097998	3.036855639	2.927670387	2.908116117	2.957449556	2.768037045	2.599002561	2.053567251	1.106239228	0.719641299	0.60205139	0.55101495	0.565517854	0.553067955	0.498376048	0.502065473	8.673475637	8.553933506
0.571053381	0.58319636	0.590062158	0.579963587	0.576629071	0.55502763	0.499007754	0.444131264	0.291629069	0.120271237	0.08873466	0.077243356	0.073655587	0.075463342	0.073084276	0.073137493	0.625013542	0.665276034	0.691044886	0.703754991	0.711467802	0.700666756	0.637479867	0.593007683	0.386492763	0.171449717	0.126918798	0.101125376	0.082032846	0.080872982	0.076173575	0.075607031	3.29451072	3.511896214	3.697349865	3.658934678	3.525362067	3.382585563	3.084688348	2.688226557	1.678942001	0.706512618	0.612706287	0.581075307	0.500503425	0.500247947	0.447150147	0.432527465	11.18052871	11.66878415
0.523526753	0.519463118	0.518092468	0.501960522	0.495034242	0.484422961	0.438337154	0.318464879	0.154884633	0.085784092	0.087122002	0.075750482	0.070319068	0.071789132	0.074344988	0.073761888	0.61048615	0.614841273	0.622542331	0.624717196	0.646005112	0.643117396	0.610382429	0.458730494	0.246881753	0.149615187	0.157465017	0.105261646	0.075108832	0.075307201	0.075680262	0.077069584	2.916101701	2.948816157	2.929606981	2.932435501	2.865235995	2.866226565	2.471419105	1.838752022	0.870140073	0.549050795	0.523398937	0.496718126	0.43494328	0.428584479	0.51572919	0.528148408	9.524105319	9.77522692
[truncated: 126 more columns]
